# Supplementary material for: Reactivity of germanones: far removed from ketones – a computational study
Source: Royal Society of Chemistry journal article supplement (doi:10.1039/c3ra44352c), 2013-01-01
Supplement: c3ra44352c.pdf [file c3ra44352c.pdf]

## Supporting Information File

### Reactivity of Germanone: Far Apart from Ketones

#### Available Information:

1. Complete Gaussian09 reference
2. E=O anharmonicity corrected stretching frequencies (in  $\text{cm}^{-1}$ )<sup>1</sup> of formaldehyde, acetone, 2,4-Dimethyl-3-pentanone, diphenyl ketone and their heavier analogs at B3LYP/6-311++G(d,p) level.
3. Cartesian Coordinates for Optimized Structures, their Energies in Hartrees and their low frequencies in  $\text{cm}^{-1}$ .

Gaussian 09 reference:

*Gaussian 09, Revision A.1*, Frisch, M. J.; Trucks, G. W.; Schlegel, H. B.; Scuseria, G. E.; Robb, M. A.; Cheeseman, J. R.; Scalmani, G.; Barone, V.; Mennucci, B.; Petersson, G. A.; Nakatsuji, H.; Caricato, M.; Li, X.; Hratchian, H. P.; Izmaylov, A. F.; Bloino, J.; Zheng, G.; Sonnenberg, J. L.; Hada, M.; Ehara, M.; Toyota, K.; Fukuda, R.; Hasegawa, J.; Ishida, M.; Nakajima, T.; Honda, Y.; Kitao, O.; Nakai, H.; Vreven, T.; Montgomery, Jr., J. A.; Peralta, J. E.; Ogliaro, F.; Bearpark, M.; Heyd, J. J.; Brothers, E.; Kudin, K. N.; Staroverov, V. N.; Kobayashi, R.; Normand, J.; Raghavachari, K.; Rendell, A.; Burant, J. C.; Iyengar, S. S.; Tomasi, J.; Cossi, M.; Rega, N.; Millam, J. M.; Klene, M.; Knox, J. E.; Cross, J. B.; Bakken, V.; Adamo, C.; Jaramillo, J.; Gomperts, R.; Stratmann, R. E.; Yazyev, O.; Austin, A. J.; Cammi, R.; Pomelli, C.; Ochterski, J. W.; Martin, R. L.; Morokuma, K.; Zakrzewski, V. G.; Voth, G. A.; Salvador, P.; Dannenberg, J. J.; Dapprich, S.; Daniels, A. D.; Farkas, Ö.; Foresman, J. B.; Ortiz, J. V.; Cioslowski, J.; Fox, D. J. Gaussian, Inc., Wallingford CT, **2009**.

**Table S1.** *E=O* anharmonicity corrected stretching frequencies (in  $\text{cm}^{-1}$ )<sup>I</sup> of formaldehyde, acetone, 2,4-Dimethyl-3-pentanone, diphenyl ketone and their heavier analogs at B3LYP/6-311++G(d,p) level.

| Molecule                        | E=O Anharmonic Stretching frequency <sup>I</sup> |
|---------------------------------|--------------------------------------------------|
| X <sub>2</sub> CO <sup>a</sup>  | 1789.86                                          |
| X <sub>2</sub> SiO <sup>a</sup> | 1194.44                                          |
| X <sub>2</sub> GeO <sup>a</sup> | 939.29                                           |
| X <sub>2</sub> CO <sup>b</sup>  | 1766.82                                          |
| X <sub>2</sub> SiO <sup>b</sup> | 1199.08                                          |
| X <sub>2</sub> GeO <sup>b</sup> | 930.37                                           |
| X <sub>2</sub> CO <sup>c</sup>  | 1728.75                                          |
| X <sub>2</sub> SiO <sup>c</sup> | 1179.93                                          |
| X <sub>2</sub> GeO <sup>c</sup> | 915.32                                           |
| X <sub>2</sub> CO <sup>d</sup>  | 1682.36                                          |
| X <sub>2</sub> SiO <sup>d</sup> | 1187.72                                          |
| X <sub>2</sub> GeO <sup>d</sup> | 918.20                                           |

### B3LYP/6-311++G(d,p)

#### Reactants

#### Formaldehyde (C)

| Atomic Number | Coordinates (Angstroms) |           |           |
|---------------|-------------------------|-----------|-----------|
|               | X                       | Y         | Z         |
| 6             | 0.000000                | 0.000000  | 0.290159  |
| 1             | 0.000000                | 0.939368  | 0.878232  |
| 1             | 0.000000                | -0.939368 | 0.878232  |
| 8             | 0.000000                | 0.000000  | -0.911410 |

B3LYP/6-311++G(d,p) = - -114.5418487 Hartrees

Low frequencies = 1202.5126                      1259.3304                      1531.4415                      1815.8108  
 2884.4272                      2941.5043

#### Formaldehyde (Si)

| Atomic Number | Coordinates (Angstroms) |           |           |
|---------------|-------------------------|-----------|-----------|
|               | X                       | Y         | Z         |
| 14            | 0.002396                | 0.000044  | 0.001712  |
| 1             | -0.006436               | -0.000014 | 1.484471  |
| 1             | 1.380822                | -0.000014 | -0.544717 |
| 8             | -1.260715               | 0.000144  | -0.861810 |

B3LYP/6-311++G(d,p) = - 365.9532032 Hartrees  
Low frequencies = 678.2478            704.3408            1018.6271            1209.6771            2222.7807  
2241.0098

### Formaldehyde (Ge)

| Atomic<br>Number | Coordinates (Angstroms) |          |           |
|------------------|-------------------------|----------|-----------|
|                  | X                       | Y        | Z         |
| 32               | -0.006578               | 0.000000 | -0.004253 |
| 1                | 0.002406                | 0.000000 | 1.536787  |
| 1                | 1.402341                | 0.000000 | -0.628619 |
| 8                | -1.390605               | 0.000000 | -0.899026 |

B3LYP/6-311++G(d,p) = -2153.4141775 Hartrees  
Low frequencies = 565.4442            575.5551            872.9614            947.5039  
2085.8565            2095.4288

### Acetone (C)

| Atomic<br>Number | Coordinates (Angstroms) |           |           |
|------------------|-------------------------|-----------|-----------|
|                  | X                       | Y         | Z         |
| 6                | 0.000000                | 0.184907  | -0.000002 |
| 8                | 0.000009                | 1.396505  | 0.000000  |
| 6                | 1.290569                | -0.612857 | -0.002025 |
| 1                | 1.287483                | -1.353941 | -0.807135 |
| 1                | 2.143188                | 0.055486  | -0.114214 |
| 1                | 1.383880                | -1.165200 | 0.939128  |
| 6                | -1.290576               | -0.612845 | 0.002024  |
| 1                | -1.383874               | -1.165236 | -0.939103 |
| 1                | -1.287515               | -1.353890 | 0.807172  |
| 1                | -2.143190               | 0.055511  | 0.114167  |

B3LYP/6-311++G(d,p) = - 193.2182695 Hartrees  
Low frequencies = 66.4768            131.9917            379.9920            489.8314            535.7046  
782.4750            883.7555            888.8748            1083.1023            1115.8168

### Acetone (Si)

| Atomic<br>Number | Coordinates (Angstroms) |           |           |
|------------------|-------------------------|-----------|-----------|
|                  | X                       | Y         | Z         |
| 14               | -0.000002               | 0.192460  | -0.000011 |
| 8                | -0.000201               | 1.727343  | 0.000006  |
| 6                | 1.555576                | -0.843969 | -0.001194 |
| 1                | 1.629946                | -1.425118 | 0.924065  |
| 1                | 1.549303                | -1.559487 | -0.829642 |
| 1                | 2.436722                | -0.206866 | -0.086016 |
| 6                | -1.555402               | -0.844250 | 0.001194  |

|   |           |           |           |
|---|-----------|-----------|-----------|
| 1 | -1.629645 | -1.425599 | -0.923944 |
| 1 | -1.549114 | -1.559574 | 0.829810  |
| 1 | -2.436622 | -0.207221 | 0.085836  |

B3LYP/6-311++G(d,p) = -444.6455586 Hartrees

|                   |          |          |          |          |          |
|-------------------|----------|----------|----------|----------|----------|
| Low frequencies = | 27.8221  | 73.1413  | 216.8720 | 256.3873 | 288.4365 |
| 618.8668          | 688.8291 | 689.5490 | 801.4726 | 808.3430 |          |

### Acetone (Ge)

| Atomic<br>Number | Coordinates (Angstroms) |           |           |
|------------------|-------------------------|-----------|-----------|
|                  | X                       | Y         | Z         |
| 32               | 0.000002                | 0.124319  | -0.000008 |
| 8                | 0.000314                | 1.778569  | 0.000012  |
| 6                | -1.648037               | -0.942932 | 0.000010  |
| 1                | -1.674843               | -1.583575 | 0.884948  |
| 1                | -2.509904               | -0.276969 | 0.000271  |
| 1                | -1.675102               | -1.583192 | -0.885198 |
| 6                | 1.647763                | -0.943369 | 0.000000  |
| 1                | 1.674788                | -1.583427 | 0.885358  |
| 1                | 1.674366                | -1.584222 | -0.884789 |
| 1                | 2.509761                | -0.277574 | -0.000478 |

B3LYP/6-311++G(d,p) = -2232.0973343 Hartrees

Low frequencies =

### 4-Dimethyl-3-pentanone (C)

| Atomic<br>Number | Coordinates (Angstroms) |           |           |
|------------------|-------------------------|-----------|-----------|
|                  | X                       | Y         | Z         |
| 8                | 0.345223                | 1.799543  | 0.014036  |
| 6                | -1.411010               | 0.249662  | -0.374628 |
| 1                | -1.802732               | 1.054182  | -1.007074 |
| 6                | 1.164554                | -0.438576 | -0.194498 |
| 1                | 0.916620                | -1.165241 | -0.975049 |
| 6                | -2.148836               | 0.343887  | 0.977518  |
| 1                | -1.967329               | 1.310732  | 1.450197  |
| 1                | -3.226035               | 0.233272  | 0.825210  |
| 1                | -1.828461               | -0.443017 | 1.666523  |
| 6                | -1.676516               | -1.089323 | -1.073397 |
| 1                | -2.750996               | -1.214270 | -1.234632 |
| 1                | -1.191279               | -1.143809 | -2.051624 |
| 1                | -1.336523               | -1.941004 | -0.477698 |
| 6                | 1.168309                | -1.187105 | 1.157199  |
| 1                | 0.215183                | -1.677689 | 1.365611  |
| 1                | 1.944741                | -1.956618 | 1.152355  |
| 1                | 1.382341                | -0.496310 | 1.977486  |
| 6                | 2.538257                | 0.168071  | -0.493977 |
| 1                | 3.299807                | -0.616572 | -0.513058 |
| 1                | 2.546799                | 0.677044  | -1.460655 |

|   |          |          |           |
|---|----------|----------|-----------|
| 1 | 2.813709 | 0.902301 | 0.265342  |
| 6 | 0.068969 | 0.633494 | -0.180754 |

B3LYP/6-311++G(d,p) = - 350.5101511 Hartrees

|                           |          |          |          |          |
|---------------------------|----------|----------|----------|----------|
| Low frequencies = 49.7229 | 63.6146  | 195.1813 | 206.6607 | 216.6895 |
| 226.3402                  | 255.1572 | 258.0791 | 292.4126 | 318.1167 |

#### 4-Dimethyl-3-pentanone (Si)

| Atomic<br>Number | Coordinates (Angstroms) |           |           |
|------------------|-------------------------|-----------|-----------|
|                  | X                       | Y         | Z         |
| 14               | 0.059552                | 0.728687  | -0.130593 |
| 8                | 0.372879                | 2.212961  | 0.126295  |
| 6                | -1.724685               | 0.119549  | -0.341020 |
| 1                | -2.192557               | 0.918556  | -0.929880 |
| 6                | 1.405354                | -0.602174 | -0.208009 |
| 1                | 1.149453                | -1.257692 | -1.051201 |
| 6                | -2.449920               | 0.072465  | 1.023666  |
| 1                | -2.390431               | 1.029544  | 1.546934  |
| 1                | -3.509259               | -0.164630 | 0.878319  |
| 1                | -2.032064               | -0.698597 | 1.679005  |
| 6                | -1.866668               | -1.206410 | -1.108582 |
| 1                | -2.924751               | -1.456203 | -1.241039 |
| 1                | -1.416048               | -1.161514 | -2.104315 |
| 1                | -1.403044               | -2.039268 | -0.571357 |
| 6                | 1.382930                | -1.466959 | 1.075667  |
| 1                | 0.414300                | -1.945905 | 1.246961  |
| 1                | 2.131566                | -2.262751 | 1.004114  |
| 1                | 1.624446                | -0.870407 | 1.960467  |
| 6                | 2.797139                | 0.005119  | -0.452270 |
| 1                | 3.554741                | -0.785501 | -0.486668 |
| 1                | 2.843119                | 0.557250  | -1.393812 |
| 1                | 3.068860                | 0.702273  | 0.343698  |

B3LYP/6-311++G(d,p) = - 601.9284527 Hartrees

|                           |          |          |          |          |
|---------------------------|----------|----------|----------|----------|
| Low frequencies = 31.6166 | 43.4748  | 113.8060 | 128.0054 | 185.8409 |
| 201.9959                  | 217.5156 | 226.3672 | 247.8580 |          |

#### 4-Dimethyl-3-pentanone (Ge)

| Atomic<br>Number | Coordinates (Angstroms) |           |           |
|------------------|-------------------------|-----------|-----------|
|                  | X                       | Y         | Z         |
| 32               | -0.000080               | -0.468934 | 0.000250  |
| 8                | 0.000324                | -2.127715 | 0.001458  |
| 6                | 1.677217                | 0.585766  | -0.260911 |
| 1                | 1.508929                | 1.146120  | -1.189385 |
| 6                | -1.677818               | 0.585222  | 0.260829  |
| 1                | -1.511163               | 1.142581  | 1.191420  |
| 6                | -2.882268               | -0.345957 | 0.440191  |
| 1                | -2.736978               | -1.047984 | 1.263420  |

|   |           |           |           |
|---|-----------|-----------|-----------|
| 1 | -3.785409 | 0.240152  | 0.645138  |
| 1 | -3.063938 | -0.938685 | -0.460068 |
| 6 | -1.879240 | 1.599559  | -0.878448 |
| 1 | -2.767892 | 2.210548  | -0.685411 |
| 1 | -1.031874 | 2.282425  | -0.987696 |
| 1 | -2.034078 | 1.099029  | -1.839333 |
| 6 | 1.880743  | 1.596473  | 0.881280  |
| 1 | 2.769219  | 2.207857  | 0.688682  |
| 1 | 1.033722  | 2.279203  | 0.994089  |
| 1 | 2.037057  | 1.092876  | 1.840321  |
| 6 | 2.881259  | -0.344952 | -0.445189 |
| 1 | 2.734917  | -1.043785 | -1.270953 |
| 1 | 3.784273  | 0.241761  | -0.648976 |
| 1 | 3.063815  | -0.941164 | 0.452575  |

B3LYP/6-311++G(d,p) = - 2389.3845372 Hartrees

|                   |          |          |          |          |          |
|-------------------|----------|----------|----------|----------|----------|
| Low frequencies = | 24.1347  | 47.1167  | 80.6404  | 102.3130 | 161.8948 |
|                   | 204.4796 | 214.6728 | 218.7219 | 245.3274 |          |

### Diphenyl ketone (C)

| Atomic<br>Number | Coordinates (Angstroms) |           |           |
|------------------|-------------------------|-----------|-----------|
|                  | X                       | Y         | Z         |
| 8                | 0.000000                | 2.318493  | 0.000002  |
| 6                | 1.299790                | 0.348285  | 0.025968  |
| 6                | 1.442109                | -0.891116 | 0.663125  |
| 6                | 2.426383                | 0.957151  | -0.544331 |
| 6                | 2.688669                | -1.510929 | 0.725075  |
| 1                | 0.585809                | -1.359776 | 1.132600  |
| 6                | 3.664046                | 0.326331  | -0.502434 |
| 1                | 2.311256                | 1.926742  | -1.013482 |
| 6                | 3.798048                | -0.908807 | 0.134663  |
| 1                | 2.793013                | -2.461762 | 1.235363  |
| 1                | 4.527062                | 0.797889  | -0.958815 |
| 1                | 4.765599                | -1.396680 | 0.174823  |
| 1                | -2.311270               | 1.926746  | 1.013471  |
| 6                | -2.426389               | 0.957152  | 0.544325  |
| 6                | -1.299791               | 0.348285  | -0.025960 |
| 6                | -3.664052               | 0.326330  | 0.502418  |
| 6                | -1.442103               | -0.891122 | -0.663112 |
| 6                | -3.798047               | -0.908810 | -0.134673 |
| 1                | -4.527072               | 0.797890  | 0.958791  |
| 6                | -2.688662               | -1.510936 | -0.725071 |
| 1                | -0.585797               | -1.359782 | -1.132575 |
| 1                | -4.765597               | -1.396685 | -0.174842 |
| 1                | -2.793002               | -2.461771 | -1.235355 |
| 6                | -0.000001               | 1.098062  | 0.000008  |

B3LYP/6-311++G(d,p) = - 576.7821673 Hartrees

### Diphenyl ketone (Si)

| Atomic<br>Number | Coordinates (Angstroms) |           |           |
|------------------|-------------------------|-----------|-----------|
|                  | X                       | Y         | Z         |
| 8                | 0.000000                | 2.711050  | 0.000028  |
| 6                | 1.587790                | 0.207461  | 0.023635  |
| 6                | 1.699868                | -1.123030 | 0.464020  |
| 6                | 2.756464                | 0.885844  | -0.370465 |
| 6                | 2.938632                | -1.759164 | 0.496760  |
| 1                | 0.823409                | -1.663426 | 0.803047  |
| 6                | 3.991454                | 0.244993  | -0.347991 |
| 1                | 2.687797                | 1.921274  | -0.685457 |
| 6                | 4.083039                | -1.078161 | 0.084091  |
| 1                | 3.011750                | -2.782795 | 0.846712  |
| 1                | 4.882693                | 0.777769  | -0.659964 |
| 1                | 5.046367                | -1.575644 | 0.106394  |
| 1                | -2.687814               | 1.921286  | 0.685400  |
| 6                | -2.756474               | 0.885850  | 0.370429  |
| 6                | -1.587793               | 0.207461  | -0.023636 |
| 6                | -3.991463               | 0.244996  | 0.347945  |
| 6                | -1.699859               | -1.123041 | -0.463992 |
| 6                | -4.083037               | -1.078168 | -0.084107 |
| 1                | -4.882709               | 0.777777  | 0.659889  |
| 6                | -2.938621               | -1.759179 | -0.496739 |
| 1                | -0.823392               | -1.663442 | -0.802991 |
| 1                | -5.046363               | -1.575655 | -0.106416 |
| 1                | -3.011729               | -2.782818 | -0.846668 |
| 14               | 0.000000                | 1.173008  | 0.000010  |

B3LYP/6-311++G(d,p) = - 828.2052664 Hartrees

Low frequencies = 36.5900                      37.2310                      79.9948                      104.2893                      144.9124  
156.0694                      238.3283                      263.0446                      325.8771

### Diphenyl ketone (Ge)

| Atomic<br>Number | Coordinates (Angstroms) |           |           |
|------------------|-------------------------|-----------|-----------|
|                  | X                       | Y         | Z         |
| 8                | -0.000003               | -2.643897 | 0.000024  |
| 6                | -1.680153               | -0.006441 | 0.021423  |
| 6                | -1.795693               | 1.342258  | 0.387595  |
| 6                | -2.836646               | -0.729366 | -0.309929 |
| 6                | -3.045068               | 1.959475  | 0.410660  |
| 1                | -0.920053               | 1.913414  | 0.674023  |
| 6                | -4.082130               | -0.107211 | -0.292880 |
| 1                | -2.753771               | -1.778889 | -0.570739 |
| 6                | -4.186428               | 1.236944  | 0.065353  |
| 1                | -3.127897               | 3.000863  | 0.701036  |
| 1                | -4.970909               | -0.670841 | -0.553500 |
| 1                | -5.157318               | 1.719538  | 0.081724  |
| 1                | 2.753786                | -1.778898 | 0.570698  |



|    |          |           |           |
|----|----------|-----------|-----------|
| 6  | 2.836654 | -0.729371 | 0.309902  |
| 6  | 1.680157 | -0.006444 | -0.021424 |
| 6  | 4.082136 | -0.107212 | 0.292848  |
| 6  | 1.795688 | 1.342262  | -0.387577 |
| 6  | 4.186427 | 1.236950  | -0.065363 |
| 1  | 4.970920 | -0.670844 | 0.553448  |
| 6  | 3.045059 | 1.959483  | -0.410645 |
| 1  | 0.920042 | 1.913418  | -0.673985 |
| 1  | 5.157314 | 1.719548  | -0.081738 |
| 1  | 3.127883 | 3.000876  | -0.701004 |
| 32 | 0.000001 | -0.986406 | 0.000002  |

B3LYP/6-311++G(d,p) = - 2615.6561727 Hartrees

Low frequencies = 31.8332                    38.0163                    71.7856                    98.2584                    132.6120  
150.1076                    225.7065                    231.1238                    244.7206

### Transition State: Addition of Acetone

#### Formaldehyde (C)

-----

| Atomic<br>Number | Coordinates (Angstroms) |           |           |
|------------------|-------------------------|-----------|-----------|
|                  | X                       | Y         | Z         |
| 6                | 1.669687                | -0.556435 | -0.106072 |
| 1                | 2.012322                | -0.410285 | -1.138656 |
| 1                | 1.895747                | -1.540390 | 0.308656  |
| 8                | 1.696694                | 0.435796  | 0.711773  |
| 1                | 0.204229                | 1.578128  | -1.257746 |
| 6                | -0.402490               | 1.354978  | -0.381226 |
| 6                | -0.812766               | 0.015915  | -0.223577 |
| 1                | 0.713986                | 1.159064  | 0.370355  |
| 1                | -1.099267               | 2.136246  | -0.101812 |
| 8                | -0.004329               | -0.948031 | -0.485947 |
| 6                | -2.114180               | -0.372314 | 0.422575  |
| 1                | -1.916920               | -0.868699 | 1.377245  |
| 1                | -2.626331               | -1.096805 | -0.216573 |
| 1                | -2.764201               | 0.487756  | 0.581727  |

B3LYP/6-311++G(d,p) = -307.711664 Hartrees

Low frequencies = -1414.3685                    71.6372                    113.8698                    178.3690                    336.0582  
432.7869                    492.1224                    539.9136                    572.1801                    644.8715

#### Formaldehyde (Si)

-----

| Atomic<br>Number | Coordinates (Angstroms) |           |           |
|------------------|-------------------------|-----------|-----------|
|                  | X                       | Y         | Z         |
| 6                | 1.849611                | -0.681941 | -0.073162 |
| 1                | 2.263863                | -0.507093 | -1.076656 |
| 1                | 2.163865                | -1.643757 | 0.340078  |
| 8                | 1.880241                | 0.315586  | 0.775723  |
| 1                | 0.453556                | 1.991741  | -1.161247 |

|    |           |           |           |
|----|-----------|-----------|-----------|
| 6  | -0.080138 | 1.708097  | -0.252693 |
| 1  | 1.002758  | 1.192619  | 0.405922  |
| 1  | -0.653672 | 2.535891  | 0.158059  |
| 8  | 0.314904  | -1.080970 | -0.480149 |
| 6  | -2.407729 | -0.480475 | 0.430397  |
| 1  | -2.306016 | -0.697836 | 1.498739  |
| 1  | -2.720859 | -1.403181 | -0.063741 |
| 1  | -3.177922 | 0.281685  | 0.298836  |
| 14 | -0.768372 | 0.078494  | -0.242274 |

B3LYP/6-311++G(d,p) = -559.1475674 Hartrees

Low frequencies = -1384.7776                      56.1723                      92.1583                      161.9911  
205.6543                      265.3137                      286.5529                      428.2901                      501.0205                      553.5471

### Formaldehyde (Ge)

| Atomic<br>Number | Coordinates (Angstroms) |           |           |
|------------------|-------------------------|-----------|-----------|
|                  | X                       | Y         | Z         |
| 6                | 2.035286                | -0.744213 | -0.077672 |
| 1                | 2.456185                | -0.541519 | -1.076243 |
| 1                | 2.397082                | -1.703585 | 0.309411  |
| 8                | 2.107045                | 0.238419  | 0.801406  |
| 1                | 0.675631                | 2.024143  | -1.097210 |
| 6                | 0.227577                | 1.772234  | -0.133509 |
| 1                | 1.264667                | 1.200979  | 0.460649  |
| 1                | -0.338681               | 2.603608  | 0.281304  |
| 8                | 0.554866                | -1.159662 | -0.433562 |
| 6                | -2.303159               | -0.586429 | 0.515341  |
| 1                | -2.224850               | -0.648893 | 1.603858  |
| 1                | -2.462720               | -1.587622 | 0.114872  |
| 1                | -3.131381               | 0.069851  | 0.248638  |
| 32               | -0.615295               | 0.103232  | -0.175406 |

B3LYP/6-311++G(d,p) = -2346.6077363 Hartrees

Low frequencies = -1328.9708                      56.9604                      88.0793                      142.5801                      166.2000  
193.9699                      235.3710                      456.3129                      512.8564                      538.3947

### Acetone (C)

| Atomic<br>Number | Coordinates (Angstroms) |           |           |
|------------------|-------------------------|-----------|-----------|
|                  | X                       | Y         | Z         |
| 8                | -0.773469               | -0.550046 | 1.247677  |
| 6                | -1.673021               | 1.455082  | 0.332787  |
| 1                | -1.739973               | 1.952756  | -0.634202 |
| 6                | -1.953006               | -0.818445 | -0.838205 |
| 1                | -2.008919               | -0.314052 | -1.802395 |
| 1                | 0.860425                | -2.144895 | -0.325861 |
| 6                | 1.428117                | -1.389950 | 0.209891  |
| 6                | 1.414076                | -0.080440 | -0.289623 |

|   |           |           |           |
|---|-----------|-----------|-----------|
| 1 | 0.253245  | -1.069439 | 1.012205  |
| 1 | 2.308894  | -1.747613 | 0.729685  |
| 8 | 0.366445  | 0.396423  | -0.852172 |
| 6 | 2.545792  | 0.885098  | -0.025194 |
| 1 | 2.182012  | 1.737812  | 0.554578  |
| 1 | 2.903800  | 1.275724  | -0.982217 |
| 1 | 3.379298  | 0.413907  | 0.496790  |
| 6 | -1.227310 | 0.023793  | 0.182730  |
| 1 | -2.970884 | -0.992365 | -0.469394 |
| 1 | -1.468556 | -1.786765 | -0.958998 |
| 1 | -0.986134 | 1.996279  | 0.982208  |
| 1 | -2.664902 | 1.456807  | 0.799246  |

B3LYP/6-311++G(d,p) = -386.3788217Hartrees

|                              |          |          |          |          |
|------------------------------|----------|----------|----------|----------|
| Low frequencies = -1210.0266 | 75.9090  | 79.2707  | 113.9447 |          |
| 198.2672                     | 235.7831 | 239.6726 | 252.4361 | 334.5357 |
| 387.3231                     |          |          |          |          |

### Acetone (Si)

| Atomic<br>Number | Coordinates (Angstroms) |           |           |
|------------------|-------------------------|-----------|-----------|
|                  | X                       | Y         | Z         |
| 8                | 0.612804                | -0.911973 | -1.385238 |
| 6                | 1.842087                | 1.635267  | -0.506773 |
| 1                | 1.914799                | 2.248228  | 0.396227  |
| 6                | 1.961099                | -0.889353 | 1.280318  |
| 1                | 2.057383                | -0.231016 | 2.148928  |
| 1                | -1.298567               | -2.072578 | 0.311494  |
| 6                | -1.738601               | -1.295472 | -0.315119 |
| 6                | -1.647391               | 0.021553  | 0.234472  |
| 1                | -0.770153               | -1.223002 | -1.103862 |
| 1                | -2.714271               | -1.573678 | -0.703095 |
| 8                | -0.519552               | 0.486838  | 0.623799  |
| 6                | -2.812951               | 0.959856  | 0.274591  |
| 1                | -2.481619               | 1.992527  | 0.376032  |
| 1                | -3.444547               | 0.702768  | 1.132509  |
| 1                | -3.428155               | 0.839537  | -0.620233 |
| 1                | 2.968114                | -1.191236 | 0.975069  |
| 1                | 1.429151                | -1.793459 | 1.588494  |
| 1                | 1.246597                | 2.172741  | -1.248470 |
| 1                | 2.849996                | 1.512530  | -0.914690 |
| 14               | 1.092843                | -0.040956 | -0.146559 |

B3LYP/6-311++G(d,p) = -637.8836768 Hartrees

|                             |          |          |          |          |
|-----------------------------|----------|----------|----------|----------|
| Low frequencies = -881.1921 | 62.1181  | 72.1192  | 98.7897  | 126.5288 |
| 143.9446                    | 187.4111 | 201.0177 | 225.5492 | 307.4724 |

### Acetone (Ge)

| Atomic<br>Number | Coordinates (Angstroms) |   |   |
|------------------|-------------------------|---|---|
|                  | X                       | Y | Z |

---

|    |           |           |           |
|----|-----------|-----------|-----------|
| 8  | 0.332700  | -0.877323 | -1.480540 |
| 6  | 1.579045  | 1.805124  | -0.406247 |
| 1  | 1.581537  | 2.357038  | 0.535322  |
| 6  | 1.851349  | -0.994202 | 1.309217  |
| 1  | 1.846839  | -0.407414 | 2.229917  |
| 1  | -1.536173 | -2.092841 | 0.291168  |
| 6  | -1.978756 | -1.298812 | -0.311036 |
| 6  | -1.922625 | -0.003316 | 0.294334  |
| 1  | -1.010362 | -1.175292 | -1.107605 |
| 1  | -2.937670 | -1.578689 | -0.738436 |
| 8  | -0.835477 | 0.442382  | 0.790186  |
| 6  | -3.096976 | 0.932628  | 0.265551  |
| 1  | -2.778977 | 1.962436  | 0.424863  |
| 1  | -3.795421 | 0.650321  | 1.061157  |
| 1  | -3.635879 | 0.840875  | -0.680500 |
| 1  | 2.886602  | -1.184673 | 1.016299  |
| 1  | 1.358083  | -1.951017 | 1.484216  |
| 1  | 0.936319  | 2.310476  | -1.127341 |
| 1  | 2.596254  | 1.773505  | -0.803155 |
| 32 | 0.934964  | -0.021054 | -0.124187 |

B3LYP/6-311++G(d,p) = -2425.3279786 Hartrees

|                   |           |          |          |          |          |
|-------------------|-----------|----------|----------|----------|----------|
| Low frequencies = | -887.7570 | 57.5770  | 65.4714  | 91.2083  | 91.9246  |
|                   | 104.1567  | 155.6690 | 163.4520 | 176.1707 | 233.1638 |

#### 4-Dimethyl-3-pentanone (C)

---

| Atomic<br>Number | Coordinates (Angstroms) |           |           |
|------------------|-------------------------|-----------|-----------|
|                  | X                       | Y         | Z         |
| 8                | -0.158390               | -0.087295 | 1.346842  |
| 6                | -0.762689               | 1.496585  | -0.379798 |
| 1                | -0.522887               | 1.483380  | -1.446597 |
| 6                | -1.432367               | -1.044176 | -0.486251 |
| 1                | -1.748632               | -0.690095 | -1.473212 |
| 6                | 0.152076                | 2.499187  | 0.330291  |
| 1                | 1.203268                | 2.227896  | 0.243386  |
| 1                | 0.024104                | 3.491184  | -0.111419 |
| 1                | -0.090936               | 2.564551  | 1.393232  |
| 6                | -2.230320               | 1.955185  | -0.240051 |
| 1                | -2.311562               | 2.986798  | -0.593013 |
| 1                | -2.918291               | 1.352435  | -0.834840 |
| 1                | -2.559311               | 1.935374  | 0.802546  |
| 6                | -2.679853               | -1.236895 | 0.407607  |
| 1                | -3.251987               | -0.322762 | 0.558651  |
| 1                | -3.343228               | -1.975347 | -0.050550 |
| 1                | -2.379079               | -1.609743 | 1.389245  |
| 6                | -0.757535               | -2.411296 | -0.666942 |
| 1                | -1.477135               | -3.110512 | -1.102517 |
| 1                | 0.110063                | -2.351088 | -1.320897 |
| 1                | -0.449522               | -2.825328 | 0.297059  |

|   |           |           |           |
|---|-----------|-----------|-----------|
| 1 | 1.529374  | -2.146937 | 0.885840  |
| 6 | 2.116352  | -1.237722 | 0.941669  |
| 6 | 2.127867  | -0.375805 | -0.160259 |
| 1 | 0.885121  | -0.553657 | 1.422300  |
| 1 | 2.988182  | -1.276358 | 1.584053  |
| 8 | 1.090562  | -0.215564 | -0.897955 |
| 6 | 3.331602  | 0.492301  | -0.457959 |
| 1 | 3.029763  | 1.463769  | -0.850926 |
| 1 | 3.929318  | -0.005530 | -1.229129 |
| 1 | 3.966264  | 0.621522  | 0.420633  |
| 6 | -0.543509 | 0.056522  | 0.115871  |

B3LYP/6-311++G(d,p) = -543.6637638 Hartrees

|                              |          |          |          |          |
|------------------------------|----------|----------|----------|----------|
| Low frequencies = -1067.0303 | 46.6875  | 66.6622  | 81.8167  | 93.8897  |
| 129.3896                     | 183.0720 | 192.8056 | 202.4850 | 217.1124 |

#### 4-Dimethyl-3-pentanone (Si)

| Atomic<br>Number | Coordinates (Angstroms) |           |           |
|------------------|-------------------------|-----------|-----------|
|                  | X                       | Y         | Z         |
| 8                | 0.015089                | -0.075673 | 1.688422  |
| 6                | -0.972335               | 1.746270  | -0.455848 |
| 1                | -0.898454               | 1.704620  | -1.551706 |
| 6                | -1.461648               | -1.378682 | -0.579265 |
| 1                | -1.797999               | -1.038117 | -1.568807 |
| 6                | -0.033919               | 2.856016  | 0.050431  |
| 1                | 1.000501                | 2.694876  | -0.265843 |
| 1                | -0.346679               | 3.832666  | -0.336346 |
| 1                | -0.043022               | 2.908255  | 1.142474  |
| 6                | -2.436284               | 2.065992  | -0.091385 |
| 1                | -2.715499               | 3.058062  | -0.463896 |
| 1                | -3.138756               | 1.348165  | -0.523341 |
| 1                | -2.584389               | 2.070314  | 0.992911  |
| 6                | -2.710455               | -1.660927 | 0.284024  |
| 1                | -3.357033               | -0.785814 | 0.388032  |
| 1                | -3.311282               | -2.462192 | -0.160728 |
| 1                | -2.423688               | -1.976640 | 1.291050  |
| 6                | -0.650327               | -2.673465 | -0.774483 |
| 1                | -1.275535               | -3.457199 | -1.216928 |
| 1                | 0.209793                | -2.527220 | -1.432966 |
| 1                | -0.285666               | -3.057224 | 0.184122  |
| 1                | 1.900529                | -2.028554 | 0.989091  |
| 6                | 2.357884                | -1.041301 | 1.066254  |
| 6                | 2.303654                | -0.278479 | -0.141197 |
| 1                | 1.385082                | -0.514251 | 1.654540  |
| 1                | 3.325339                | -1.064959 | 1.559705  |
| 8                | 1.188742                | -0.093036 | -0.745270 |
| 6                | 3.499029                | 0.431356  | -0.697895 |
| 1                | 3.203195                | 1.213905  | -1.395317 |
| 1                | 4.127770                | -0.295517 | -1.224520 |
| 1                | 4.104871                | 0.846908  | 0.110988  |

14 -0.434523 0.034207 0.165603

B3LYP/6-311++G(d,p) = - 795.1650189 Hartrees

Low frequencies = -911.7760 34.0572 40.0561 60.4071 69.0693  
80.6397 114.8978 126.3983 171.0518 192.4074

#### 4-Dimethyl-3-pentanone (Ge)

| Atomic<br>Number | Coordinates (Angstroms) |           |           |
|------------------|-------------------------|-----------|-----------|
|                  | X                       | Y         | Z         |
| 8                | 0.173823                | -0.117491 | 1.752737  |
| 6                | -0.842287               | 1.879143  | -0.489458 |
| 1                | -0.732758               | 1.830092  | -1.579082 |
| 6                | -1.530792               | -1.424221 | -0.613746 |
| 1                | -1.830814               | -1.079042 | -1.610458 |
| 6                | 0.149765                | 2.904073  | 0.072719  |
| 1                | 1.176829                | 2.685878  | -0.230209 |
| 1                | -0.095265               | 3.909703  | -0.288822 |
| 1                | 0.121793                | 2.922331  | 1.165290  |
| 6                | -2.295975               | 2.255111  | -0.156275 |
| 1                | -2.526169               | 3.255018  | -0.541649 |
| 1                | -3.017806               | 1.562764  | -0.598672 |
| 1                | -2.466685               | 2.275227  | 0.924415  |
| 6                | -2.790033               | -1.623029 | 0.248108  |
| 1                | -3.403576               | -0.719928 | 0.310303  |
| 1                | -3.417741               | -2.416937 | -0.172881 |
| 1                | -2.525920               | -1.913849 | 1.268729  |
| 6                | -0.742211               | -2.732065 | -0.759039 |
| 1                | -1.377125               | -3.512625 | -1.194346 |
| 1                | 0.131001                | -2.615009 | -1.404925 |
| 1                | -0.401202               | -3.097105 | 0.214733  |
| 1                | 1.934655                | -2.157201 | 0.833280  |
| 6                | 2.430851                | -1.194818 | 0.959812  |
| 6                | 2.427014                | -0.377840 | -0.215149 |
| 1                | 1.488253                | -0.637830 | 1.582649  |
| 1                | 3.384782                | -1.275426 | 1.473996  |
| 8                | 1.353240                | -0.179852 | -0.873866 |
| 6                | 3.651862                | 0.374868  | -0.653339 |
| 1                | 3.392898                | 1.173759  | -1.347233 |
| 1                | 4.338253                | -0.319310 | -1.150433 |
| 1                | 4.180906                | 0.779742  | 0.213228  |
| 32               | -0.416249               | 0.042536  | 0.148104  |

B3LYP/6-311++G(d,p) = - 2582.6131301 Hartrees

Low frequencies = -899.5588 32.5424 40.0140 56.9843 67.3038  
78.5705 91.4430 96.9137 146.1892 167.7683

#### Diphenyl ketone (C)

| Atomic<br>Number | Coordinates (Angstroms) |   |   |
|------------------|-------------------------|---|---|
|                  | X                       | Y | Z |

---

|   |           |           |           |
|---|-----------|-----------|-----------|
| 8 | 0.090801  | 1.067498  | 1.590490  |
| 1 | 0.224210  | 3.543198  | 0.674626  |
| 6 | -0.793853 | 3.253794  | 0.439237  |
| 6 | -1.020786 | 2.375511  | -0.619951 |
| 1 | -0.520851 | 1.926185  | 1.324915  |
| 1 | -1.581484 | 3.917484  | 0.776109  |
| 8 | -0.118751 | 1.547817  | -0.999499 |
| 6 | -2.389439 | 2.273994  | -1.265822 |
| 1 | -2.771206 | 1.253027  | -1.192026 |
| 1 | -2.285210 | 2.503248  | -2.330622 |
| 1 | -3.110004 | 2.967335  | -0.828896 |
| 6 | -0.968034 | -0.666991 | 0.332581  |
| 6 | -1.919500 | -0.869296 | 1.340784  |
| 6 | -1.140253 | -1.301171 | -0.907762 |
| 6 | -3.017151 | -1.698880 | 1.118396  |
| 1 | -1.783884 | -0.385018 | 2.299785  |
| 6 | -2.237525 | -2.124259 | -1.126565 |
| 1 | -0.435196 | -1.105322 | -1.704841 |
| 6 | -3.177817 | -2.328432 | -0.113182 |
| 1 | -3.743105 | -1.854079 | 1.908465  |
| 1 | -2.369407 | -2.599312 | -2.092139 |
| 1 | -4.032572 | -2.972423 | -0.287469 |
| 6 | 1.576370  | -0.184609 | 0.245587  |
| 6 | 2.595424  | 0.779649  | 0.267420  |
| 6 | 1.904668  | -1.512540 | -0.056441 |
| 6 | 3.904636  | 0.426590  | -0.026135 |
| 1 | 2.340659  | 1.804951  | 0.497543  |
| 6 | 3.222773  | -1.866366 | -0.339528 |
| 1 | 1.138504  | -2.276437 | -0.046420 |
| 6 | 4.223363  | -0.898948 | -0.331865 |
| 1 | 4.680699  | 1.183513  | -0.020431 |
| 1 | 3.464828  | -2.899353 | -0.562090 |
| 1 | 5.247518  | -1.173514 | -0.558633 |
| 6 | 0.197139  | 0.215954  | 0.612279  |

B3LYP/6-311++G(d,p) = -769.9353024 Hartrees

Low frequencies = -558.6515      33.4279      49.7452      64.6382      71.7332  
92.6631      97.5322      126.5494      144.4375      198.5812

### Diphenyl ketone (Si)

---

| Atomic<br>Number | Coordinates (Angstroms) |          |           |
|------------------|-------------------------|----------|-----------|
|                  | X                       | Y        | Z         |
| 14               | 0.035965                | 0.364833 | 0.549795  |
| 8                | 0.149087                | 1.243037 | 1.868791  |
| 1                | 1.967790                | 2.862185 | 0.508801  |
| 6                | 0.973067                | 3.310211 | 0.507505  |
| 6                | 0.137570                | 2.877580 | -0.564946 |
| 1                | 0.513534                | 2.545185 | 1.398230  |
| 1                | 0.990434                | 4.380464 | 0.688997  |

|   |           |           |           |
|---|-----------|-----------|-----------|
| 8 | -0.027916 | 1.625459  | -0.796091 |
| 6 | -0.674062 | 3.818642  | -1.397663 |
| 1 | -1.593503 | 3.342617  | -1.738670 |
| 1 | -0.083580 | 4.096349  | -2.279012 |
| 1 | -0.891959 | 4.736481  | -0.849700 |
| 6 | -1.593919 | -0.508095 | 0.242554  |
| 6 | -2.357193 | -0.922541 | 1.346120  |
| 6 | -2.083216 | -0.788175 | -1.043807 |
| 6 | -3.560893 | -1.603555 | 1.170311  |
| 1 | -2.009973 | -0.698796 | 2.349301  |
| 6 | -3.287356 | -1.467083 | -1.222388 |
| 1 | -1.530612 | -0.459301 | -1.918165 |
| 6 | -4.026651 | -1.879034 | -0.114190 |
| 1 | -4.136750 | -1.914772 | 2.035176  |
| 1 | -3.651025 | -1.670601 | -2.223955 |
| 1 | -4.963545 | -2.407818 | -0.251942 |
| 6 | 1.535214  | -0.674989 | 0.113073  |
| 6 | 2.710693  | -0.499647 | 0.862236  |
| 6 | 1.545955  | -1.626181 | -0.920137 |
| 6 | 3.860345  | -1.235876 | 0.579358  |
| 1 | 2.712298  | 0.208790  | 1.684210  |
| 6 | 2.694168  | -2.361194 | -1.208398 |
| 1 | 0.648012  | -1.806802 | -1.501905 |
| 6 | 3.854444  | -2.164849 | -0.459803 |
| 1 | 4.756767  | -1.089951 | 1.172476  |
| 1 | 2.683102  | -3.090924 | -2.010858 |
| 1 | 4.747124  | -2.740020 | -0.680664 |

B3LYP/6-311++G(d,p) = -1021.437926 Hartrees

|                   |           |         |          |          |         |
|-------------------|-----------|---------|----------|----------|---------|
| Low frequencies = | -952.3191 | 19.9186 | 24.6357  | 38.7173  | 47.7346 |
| 68.0679           | 74.2892   | 82.4396 | 136.6372 | 151.9954 |         |

### Diphenyl ketone (Ge)

| Atomic<br>Number | Coordinates (Angstroms) |           |           |
|------------------|-------------------------|-----------|-----------|
|                  | X                       | Y         | Z         |
| 8                | 0.136601                | 1.329390  | -1.857844 |
| 1                | -1.599784               | 3.040189  | -0.409738 |
| 6                | -0.562871               | 3.376726  | -0.376689 |
| 6                | 0.187803                | 2.855859  | 0.722471  |
| 1                | -0.147882               | 2.589332  | -1.278536 |
| 1                | -0.455927               | 4.442098  | -0.559596 |
| 8                | 0.167822                | 1.609789  | 1.002114  |
| 6                | 1.119676                | 3.714859  | 1.527671  |
| 1                | 1.911008                | 3.114683  | 1.976184  |
| 1                | 0.547546                | 4.194017  | 2.330430  |
| 1                | 1.542182                | 4.511870  | 0.912439  |
| 6                | 1.591202                | -0.817879 | -0.158241 |
| 6                | 2.799372                | -0.460225 | -0.770754 |
| 6                | 1.550107                | -1.951134 | 0.662369  |
| 6                | 3.950206                | -1.214663 | -0.551237 |



|    |           |           |           |
|----|-----------|-----------|-----------|
| 1  | 2.829088  | 0.401389  | -1.429149 |
| 6  | 2.702512  | -2.705600 | 0.881391  |
| 1  | 0.619285  | -2.258174 | 1.127600  |
| 6  | 3.903161  | -2.335692 | 0.277443  |
| 1  | 4.881289  | -0.932460 | -1.030602 |
| 1  | 2.661765  | -3.582266 | 1.518597  |
| 1  | 4.798547  | -2.923962 | 0.446007  |
| 6  | -1.716536 | -0.544544 | -0.108434 |
| 6  | -2.606502 | -0.807402 | -1.158012 |
| 6  | -2.093109 | -0.873632 | 1.200760  |
| 6  | -3.844970 | -1.396441 | -0.904345 |
| 1  | -2.335959 | -0.541240 | -2.174575 |
| 6  | -3.333005 | -1.458790 | 1.453942  |
| 1  | -1.428397 | -0.658798 | 2.031125  |
| 6  | -4.208101 | -1.724020 | 0.400922  |
| 1  | -4.526532 | -1.594820 | -1.724290 |
| 1  | -3.617087 | -1.704978 | 2.471360  |
| 1  | -5.171909 | -2.180206 | 0.598481  |
| 32 | 0.013241  | 0.269542  | -0.517357 |

B3LYP/6-311++G(d,p) = -2808.8820985 Hartrees

|                   |           |         |          |          |         |
|-------------------|-----------|---------|----------|----------|---------|
| Low frequencies = | -951.2988 | 18.2126 | 25.0261  | 32.3677  | 42.2826 |
| 57.5110           | 71.9221   | 82.6562 | 125.7850 | 140.5755 |         |

### Products: Addition of Acetone

#### Formaldehyde (C)

| -----  |                         |           |           |
|--------|-------------------------|-----------|-----------|
| Atomic | Coordinates (Angstroms) |           |           |
| Number | X                       | Y         | Z         |
| -----  |                         |           |           |
| 6      | 1.444951                | -0.384809 | -0.474757 |
| 1      | 1.434554                | 0.330785  | -1.305622 |
| 1      | 1.992967                | -1.281365 | -0.754628 |
| 8      | 2.081788                | 0.135063  | 0.657713  |
| 1      | 0.209313                | 1.919072  | -0.493077 |
| 6      | -0.721195               | 1.439647  | -0.217833 |
| 6      | -0.869965               | 0.116304  | -0.071771 |
| 1      | 1.654770                | 0.961476  | 0.909818  |
| 1      | -1.577957               | 2.085573  | -0.088741 |
| 8      | 0.116717                | -0.822665 | -0.218869 |
| 6      | -2.161737               | -0.554880 | 0.282107  |
| 1      | -2.432639               | -1.279339 | -0.491336 |
| 1      | -2.966391               | 0.172644  | 0.385337  |
| 1      | -2.054978               | -1.105604 | 1.221019  |

B3LYP/6-311++G(d,p) = -307.7561688 Hartrees

|                   |          |          |          |          |          |
|-------------------|----------|----------|----------|----------|----------|
| Low frequencies = | 88.9853  | 136.9756 | 181.0762 | 300.3072 | 370.4282 |
| 418.0434          | 474.9857 | 517.1169 | 624.5443 | 725.7426 |          |

#### Formaldehyde (Si)

-----

| Atomic<br>Number | Coordinates (Angstroms) |           |           |
|------------------|-------------------------|-----------|-----------|
|                  | X                       | Y         | Z         |
| 6                | 1.276833                | 0.172250  | -0.021852 |
| 8                | 0.204245                | -0.668207 | -0.224939 |
| 6                | 2.574956                | -0.560632 | -0.165782 |
| 1                | 2.637010                | -1.023102 | -1.155532 |
| 6                | 1.151434                | 1.473551  | 0.250217  |
| 1                | -2.372813               | 0.721452  | -1.343216 |
| 1                | 2.641457                | -1.365796 | 0.572395  |
| 1                | 2.034141                | 2.079131  | 0.403943  |
| 1                | 3.423048                | 0.111788  | -0.035267 |
| 1                | 0.187108                | 1.961797  | 0.313857  |
| 1                | -1.405685               | -0.242107 | 1.745341  |
| 14               | -1.374256               | -0.529820 | 0.299283  |
| 1                | -1.966158               | -1.829991 | -0.075986 |
| 8                | -2.198978               | 0.729868  | -0.398934 |

B3LYP/6-311++G(d,p) = -559.250617 Hartrees

|                           |          |          |          |          |
|---------------------------|----------|----------|----------|----------|
| Low frequencies = 51.6204 | 91.5115  | 150.8282 | 200.4172 | 256.2969 |
| 320.9630                  | 388.4091 | 499.1188 | 512.2543 | 640.1209 |

### Formaldehyde (Ge)

| Atomic<br>Number | Coordinates (Angstroms) |           |           |
|------------------|-------------------------|-----------|-----------|
|                  | X                       | Y         | Z         |
| 6                | -1.661211               | 0.135081  | -0.032273 |
| 8                | -0.594489               | -0.695222 | 0.159976  |
| 6                | -2.939272               | -0.536094 | 0.377118  |
| 1                | -3.085422               | -1.450550 | -0.205276 |
| 6                | -1.589755               | 1.381760  | -0.516659 |
| 1                | -0.657570               | 1.844113  | -0.820032 |
| 1                | -3.796732               | 0.120781  | 0.229844  |
| 1                | -2.487920               | 1.970158  | -0.640917 |
| 1                | -2.888196               | -0.826627 | 1.430486  |
| 1                | 1.299145                | 1.773817  | 0.888524  |
| 32               | 1.136129                | -0.305760 | -0.217767 |
| 1                | 1.221027                | 0.191924  | -1.667082 |
| 1                | 1.884128                | -1.585155 | 0.121604  |
| 8                | 1.756594                | 0.927894  | 0.922808  |

B3LYP/6-311++G(d,p) = -2346.6956596 Hartrees

|                           |          |          |          |          |
|---------------------------|----------|----------|----------|----------|
| Low frequencies = 38.8433 | 76.5234  | 147.2578 | 190.0073 | 203.0341 |
| 257.4377                  | 327.3446 | 467.0113 | 508.6901 | 551.1282 |

### Acetone (C)

| Atomic<br>Number | Coordinates (Angstroms) |   |   |
|------------------|-------------------------|---|---|
|                  | X                       | Y | Z |

|   |           |           |           |
|---|-----------|-----------|-----------|
| 6 | -1.427306 | 0.026261  | 0.051956  |
| 8 | -0.248022 | -0.641337 | 0.199934  |
| 6 | -1.618619 | 1.343706  | -0.119614 |
| 1 | 0.430807  | 1.233819  | -1.371115 |
| 6 | -2.559110 | -0.959942 | 0.104896  |
| 1 | -2.460314 | -1.691209 | -0.702317 |
| 1 | -0.836887 | 2.089362  | -0.110563 |
| 1 | -3.522628 | -0.458342 | 0.017521  |
| 1 | -2.627899 | 1.711640  | -0.240516 |
| 1 | -2.530097 | -1.511191 | 1.049217  |
| 1 | 1.714172  | -1.893346 | -0.890771 |
| 6 | 2.008593  | -1.229527 | -0.077475 |
| 6 | 1.058716  | -0.042072 | -0.028272 |
| 1 | 1.975639  | -1.779228 | 0.864132  |
| 1 | 3.026438  | -0.878628 | -0.254906 |
| 8 | 1.120248  | 0.563206  | -1.298228 |
| 6 | 1.419494  | 0.919085  | 1.108995  |
| 1 | 0.751135  | 1.777172  | 1.161773  |
| 1 | 2.436742  | 1.284145  | 0.954694  |
| 1 | 1.374479  | 0.395790  | 2.066287  |

B3LYP/6-311++G(d,p) = -386.4112169 Hartrees

|                           |          |          |          |          |
|---------------------------|----------|----------|----------|----------|
| Low frequencies = 68.9887 | 128.5148 | 174.9562 | 183.2843 | 191.5734 |
| 242.7982                  | 311.2752 | 327.2661 | 345.0916 | 381.1254 |

### Acetone (Si)

| Atomic<br>Number | Coordinates (Angstroms) |           |           |
|------------------|-------------------------|-----------|-----------|
|                  | X                       | Y         | Z         |
| 8                | -1.339728               | -1.139069 | -1.162837 |
| 6                | -1.260755               | -0.843820 | 1.632031  |
| 6                | -2.090788               | 1.533523  | -0.235739 |
| 1                | -1.907540               | 1.996681  | -1.209688 |
| 1                | -3.152277               | 1.276758  | -0.176908 |
| 1                | -1.878807               | 2.283788  | 0.531031  |
| 1                | -0.570654               | -1.683653 | 1.740112  |
| 1                | -1.092521               | -0.155867 | 2.465199  |
| 1                | -2.279458               | -1.233159 | 1.712979  |
| 14               | -1.024099               | 0.019279  | -0.002318 |
| 1                | -1.251477               | -0.907294 | -2.090420 |
| 6                | 1.961196                | -1.307111 | -0.271159 |
| 6                | 1.766727                | 0.002188  | -0.084561 |
| 1                | 1.149983                | -1.984080 | -0.505698 |
| 1                | 2.959837                | -1.716522 | -0.201792 |
| 8                | 0.541486                | 0.615479  | -0.156494 |
| 6                | 2.853518                | 0.993557  | 0.206342  |
| 1                | 2.864615                | 1.773952  | -0.560732 |
| 1                | 3.831037                | 0.511433  | 0.235266  |
| 1                | 2.671205                | 1.486768  | 1.166267  |

B3LYP/6-311++G(d,p) = -637.9371494 Hartrees

Low frequencies = 46.0144                      74.1804                      108.6997                      127.4822                      144.7421  
187.5625                      196.8782                      212.0665                      239.8239                      268.1567

### Acetone (Ge)

| Atomic<br>Number | Coordinates (Angstroms) |           |           |
|------------------|-------------------------|-----------|-----------|
|                  | X                       | Y         | Z         |
| 6                | -2.008173               | 0.024310  | -0.103991 |
| 8                | -0.825959               | 0.709519  | -0.161588 |
| 6                | -2.143772               | -1.286675 | -0.339640 |
| 1                | 1.020944                | -0.836550 | -2.175495 |
| 6                | -3.147095               | 0.943318  | 0.233920  |
| 1                | -3.205413               | 1.752141  | -0.500901 |
| 1                | -3.119983               | -1.747959 | -0.275005 |
| 1                | -2.984616               | 1.407029  | 1.211986  |
| 1                | -1.305536               | -1.911786 | -0.620599 |
| 1                | -4.097438               | 0.408700  | 0.247545  |
| 1                | 0.214440                | -1.737800 | 1.729960  |
| 6                | 1.013054                | -0.998189 | 1.675845  |
| 1                | 1.976016                | -1.511599 | 1.692563  |
| 1                | 0.945385                | -0.333189 | 2.538376  |
| 32               | 0.854425                | 0.022287  | 0.026061  |
| 8                | 1.161467                | -1.177778 | -1.286700 |
| 6                | 1.958153                | 1.614284  | -0.195465 |
| 1                | 1.733516                | 2.085959  | -1.153564 |
| 1                | 1.748176                | 2.329305  | 0.601896  |
| 1                | 3.015840                | 1.346336  | -0.168430 |

B3LYP/6-311++G(d,p) = -2425.3765969 Hartrees

Low frequencies = 48.3294                      67.8217                      70.9947                      100.2158                      108.9462  
158.3988                      183.8881                      186.4193                      196.1800                      205.5416

### 4-Dimethyl-3-pentanone (C)

| Atomic<br>Number | Coordinates (Angstroms) |           |           |
|------------------|-------------------------|-----------|-----------|
|                  | X                       | Y         | Z         |
| 8                | 0.453566                | 0.032505  | 1.453543  |
| 6                | 1.360927                | -1.159045 | -0.486630 |
| 1                | 1.177538                | -1.187626 | -1.566287 |
| 6                | 0.781249                | 1.371778  | -0.531467 |
| 1                | 1.369224                | 1.163741  | -1.432385 |
| 6                | 0.998785                | -2.539498 | 0.084920  |
| 1                | -0.055341               | -2.776282 | -0.062353 |
| 1                | 1.591367                | -3.312877 | -0.410497 |
| 1                | 1.231908                | -2.611982 | 1.154406  |
| 6                | 2.850698                | -0.874800 | -0.250482 |
| 1                | 3.447274                | -1.708278 | -0.631220 |
| 1                | 3.193836                | 0.028103  | -0.757873 |
| 1                | 3.068416                | -0.770147 | 0.815923  |

|   |           |           |           |
|---|-----------|-----------|-----------|
| 6 | 1.657134  | 2.203040  | 0.421739  |
| 1 | 2.536544  | 1.662052  | 0.770016  |
| 1 | 1.996038  | 3.106508  | -0.093505 |
| 1 | 1.089386  | 2.508109  | 1.302905  |
| 6 | -0.419082 | 2.213934  | -0.991017 |
| 1 | -0.048221 | 3.120449  | -1.478333 |
| 1 | -1.042198 | 1.679509  | -1.709010 |
| 1 | -1.049195 | 2.518687  | -0.154156 |
| 1 | -1.651873 | 0.974550  | 1.821626  |
| 6 | -2.395254 | 0.472019  | 1.225068  |
| 6 | -2.107357 | -0.241036 | 0.129884  |
| 1 | 0.263514  | -0.841803 | 1.812730  |
| 1 | -3.431571 | 0.549545  | 1.526502  |
| 8 | -0.880227 | -0.480766 | -0.438132 |
| 6 | -3.151894 | -0.935965 | -0.699288 |
| 1 | -2.949477 | -2.010124 | -0.749935 |
| 1 | -3.138327 | -0.555757 | -1.725366 |
| 1 | -4.146336 | -0.783437 | -0.279830 |
| 6 | 0.418257  | -0.038234 | 0.051167  |

B3LYP/6-311++G(d,p) = - 543.6936525Hartrees

|                   |          |          |          |          |          |
|-------------------|----------|----------|----------|----------|----------|
| Low frequencies = | 29.7938  | 59.7955  | 85.4136  | 109.3888 | 170.1864 |
|                   | 192.1352 | 197.0170 | 217.6232 | 240.8273 | 250.7024 |

#### 4-Dimethyl-3-pentanone (Si)

| Atomic<br>Number | Coordinates (Angstroms) |           |           |
|------------------|-------------------------|-----------|-----------|
|                  | X                       | Y         | Z         |
| 14               | 0.397270                | -0.019524 | 0.112265  |
| 8                | 0.488355                | 0.142182  | 1.774216  |
| 6                | 1.540452                | -1.381457 | -0.533121 |
| 1                | 1.296337                | -1.467544 | -1.601101 |
| 6                | 0.749690                | 1.696387  | -0.603692 |
| 1                | 1.153045                | 1.501435  | -1.608386 |
| 6                | 1.238181                | -2.743124 | 0.122455  |
| 1                | 0.187751                | -3.023684 | 0.013560  |
| 1                | 1.844411                | -3.534888 | -0.331117 |
| 1                | 1.479196                | -2.733635 | 1.191731  |
| 6                | 3.036450                | -1.034385 | -0.413557 |
| 1                | 3.652972                | -1.841316 | -0.824567 |
| 1                | 3.294081                | -0.119979 | -0.954717 |
| 1                | 3.333686                | -0.897421 | 0.631111  |
| 6                | 1.825390                | 2.459843  | 0.197120  |
| 1                | 2.762831                | 1.904115  | 0.279218  |
| 1                | 2.050024                | 3.417317  | -0.285720 |
| 1                | 1.479961                | 2.667859  | 1.212749  |
| 6                | -0.512811               | 2.563717  | -0.777414 |
| 1                | -0.257120               | 3.510610  | -1.265746 |
| 1                | -1.273643               | 2.068765  | -1.384999 |
| 1                | -0.967766               | 2.804739  | 0.187143  |
| 1                | -2.047444               | 0.755346  | 1.801086  |

|   |           |           |           |
|---|-----------|-----------|-----------|
| 6 | -2.773120 | 0.296562  | 1.143217  |
| 6 | -2.415245 | -0.380945 | 0.047721  |
| 1 | 0.311126  | -0.621989 | 2.328133  |
| 1 | -3.821152 | 0.398242  | 1.390222  |
| 8 | -1.121119 | -0.578575 | -0.354682 |
| 6 | -3.378179 | -1.040416 | -0.895131 |
| 1 | -3.168365 | -2.112457 | -0.960871 |
| 1 | -3.265355 | -0.627361 | -1.902461 |
| 1 | -4.409073 | -0.900761 | -0.568844 |

B3LYP/6-311++G(d,p) = -795.2164974 Hartrees

|                           |          |          |          |          |
|---------------------------|----------|----------|----------|----------|
| Low frequencies = 28.9723 | 37.1736  | 47.9311  | 68.9998  | 99.0191  |
| 115.3193                  | 157.8895 | 166.2402 | 184.1203 | 201.6231 |

#### 4-Dimethyl-3-pentanone (Ge)

| Atomic<br>Number | Coordinates (Angstroms) |           |           |
|------------------|-------------------------|-----------|-----------|
|                  | X                       | Y         | Z         |
| 8                | 0.455132                | 0.085631  | 2.004078  |
| 6                | 1.965521                | -0.892386 | -0.561833 |
| 1                | 1.780904                | -0.905523 | -1.642182 |
| 6                | 0.198927                | 1.983135  | -0.324450 |
| 1                | 1.213090                | 2.390294  | -0.225303 |
| 6                | 2.004715                | -2.344086 | -0.061572 |
| 1                | 1.066443                | -2.866057 | -0.260706 |
| 1                | 2.811135                | -2.897265 | -0.556042 |
| 1                | 2.199777                | -2.390244 | 1.015370  |
| 6                | 3.286846                | -0.156816 | -0.290334 |
| 1                | 4.125491                | -0.698953 | -0.741108 |
| 1                | 3.292834                | 0.855261  | -0.705017 |
| 1                | 3.487380                | -0.078164 | 0.782625  |
| 6                | -0.725659               | 2.768098  | 0.617375  |
| 1                | -0.418771               | 2.670205  | 1.660442  |
| 1                | -0.709370               | 3.832302  | 0.355272  |
| 1                | -1.758821               | 2.421762  | 0.537771  |
| 6                | -0.230325               | 2.104666  | -1.795178 |
| 1                | -0.264118               | 3.158176  | -2.093704 |
| 1                | 0.457537                | 1.593549  | -2.475524 |
| 1                | -1.227365               | 1.684789  | -1.953686 |
| 1                | -2.163010               | 0.158696  | 1.769830  |
| 6                | -2.785534               | -0.367148 | 1.057864  |
| 6                | -2.280554               | -0.958962 | -0.031963 |
| 1                | 0.472357                | -0.792362 | 2.397656  |
| 1                | -3.847294               | -0.422851 | 1.256804  |
| 8                | -0.962086               | -0.965909 | -0.386205 |
| 6                | -3.102882               | -1.737241 | -1.020412 |
| 1                | -2.735288               | -2.765986 | -1.085462 |
| 1                | -3.012907               | -1.298934 | -2.019238 |
| 1                | -4.154914               | -1.755420 | -0.733800 |
| 32               | 0.420444                | 0.086043  | 0.194876  |

B3LYP/6-311++G(d,p) = -2582.6611508 Hartrees

Low frequencies = 18.1815                      30.1096                      44.4232                      60.9472                      77.9689  
96.5084                      116.2505                      154.4133                      170.3298                      194.6702

### Diphenyl ketone (C)

---

| Atomic<br>Number | Coordinates (Angstroms) |           |           |
|------------------|-------------------------|-----------|-----------|
|                  | X                       | Y         | Z         |
| 8                | 0.107859                | 0.502127  | 1.995373  |
| 1                | 2.456697                | 1.122594  | 1.587866  |
| 6                | 2.509288                | 1.951137  | 0.900700  |
| 6                | 1.510852                | 2.293338  | 0.085286  |
| 1                | -0.573167               | 1.104176  | 2.318076  |
| 1                | 3.419140                | 2.536109  | 0.877470  |
| 8                | 0.284157                | 1.666686  | -0.033648 |
| 6                | 1.546588                | 3.462088  | -0.855241 |
| 1                | 0.724853                | 4.151839  | -0.639140 |
| 1                | 1.428614                | 3.127974  | -1.890893 |
| 1                | 2.489455                | 4.001422  | -0.765005 |
| 6                | -0.021753               | 0.415881  | 0.592738  |
| 6                | -1.481637               | 0.117285  | 0.214748  |
| 6                | -2.149163               | -0.911417 | 0.890030  |
| 6                | -2.156842               | 0.821925  | -0.784240 |
| 6                | -3.468858               | -1.223420 | 0.577555  |
| 1                | -1.631907               | -1.469374 | 1.661578  |
| 6                | -3.479213               | 0.505744  | -1.097497 |
| 1                | -1.651211               | 1.621512  | -1.307382 |
| 6                | -4.139462               | -0.515446 | -0.419680 |
| 1                | -3.972638               | -2.021873 | 1.110895  |
| 1                | -3.992610               | 1.063828  | -1.872780 |
| 1                | -5.167078               | -0.759109 | -0.664975 |
| 6                | 0.902403                | -0.701665 | 0.098876  |
| 6                | 1.449340                | -1.637696 | 0.977487  |
| 6                | 1.157693                | -0.820115 | -1.270151 |
| 6                | 2.250415                | -2.672049 | 0.492971  |
| 1                | 1.256912                | -1.549560 | 2.038603  |
| 6                | 1.959085                | -1.850158 | -1.751852 |
| 1                | 0.730726                | -0.100837 | -1.959112 |
| 6                | 2.508794                | -2.781462 | -0.870662 |
| 1                | 2.674679                | -3.390212 | 1.186029  |
| 1                | 2.153835                | -1.927562 | -2.815735 |
| 1                | 3.132381                | -3.585249 | -1.245705 |

B3LYP/6-311++G(d,p) = -769.9679389 Hartrees

Low frequencies = 31.8770                      45.9542                      53.1342                      61.0905                      79.1355  
106.5964                      172.9680                      189.8472                      210.9774                      247.0387

### Diphenyl ketone (Si)

---

| Atomic<br>Number | Coordinates (Angstroms) |   |   |
|------------------|-------------------------|---|---|
|                  | X                       | Y | Z |

---

|    |           |           |           |
|----|-----------|-----------|-----------|
| 14 | -0.054277 | 0.344811  | 0.634854  |
| 8  | 0.147752  | 0.422161  | 2.287611  |
| 1  | 2.093610  | 2.169429  | 1.651378  |
| 6  | 2.058733  | 2.838740  | 0.802037  |
| 6  | 1.098565  | 2.766519  | -0.122677 |
| 1  | -0.535717 | 0.844023  | 2.814023  |
| 1  | 2.833167  | 3.588631  | 0.714329  |
| 8  | 0.074216  | 1.848248  | -0.091331 |
| 6  | 0.977493  | 3.675513  | -1.308257 |
| 1  | 0.012248  | 4.191294  | -1.292368 |
| 1  | 1.022139  | 3.097987  | -2.236947 |
| 1  | 1.774303  | 4.419596  | -1.316231 |
| 6  | -1.789842 | -0.194042 | 0.183727  |
| 6  | -2.249669 | -1.464794 | 0.570267  |
| 6  | -2.668451 | 0.638975  | -0.527277 |
| 6  | -3.540682 | -1.886923 | 0.261373  |
| 1  | -1.593202 | -2.136602 | 1.115191  |
| 6  | -3.960917 | 0.218684  | -0.838877 |
| 1  | -2.332831 | 1.621542  | -0.838492 |
| 6  | -4.398849 | -1.044239 | -0.444716 |
| 1  | -3.876493 | -2.871566 | 0.567869  |
| 1  | -4.625111 | 0.876111  | -1.389467 |
| 1  | -5.403581 | -1.372390 | -0.687925 |
| 6  | 1.296412  | -0.809238 | 0.057462  |
| 6  | 2.170182  | -1.428708 | 0.964612  |
| 6  | 1.453891  | -1.086126 | -1.310676 |
| 6  | 3.169099  | -2.293415 | 0.518962  |
| 1  | 2.065488  | -1.229076 | 2.024975  |
| 6  | 2.451758  | -1.948201 | -1.758733 |
| 1  | 0.790180  | -0.627429 | -2.037532 |
| 6  | 3.311697  | -2.553497 | -0.842611 |
| 1  | 3.836135  | -2.762697 | 1.234017  |
| 1  | 2.558450  | -2.149122 | -2.819147 |
| 1  | 4.088817  | -3.225862 | -1.189570 |

B3LYP/6-311++G(d,p) = -1021.4911101 Hartrees

Low frequencies = 15.1679                      24.7880                      33.3991                      42.1018                      49.2555  
65.5168                      111.5160                      141.9889                      154.0805                      197.0696

### Diphenyl ketone (Ge)

---

| Atomic<br>Number | Coordinates (Angstroms) |          |           |
|------------------|-------------------------|----------|-----------|
|                  | X                       | Y        | Z         |
| 8                | 0.171953                | 0.391301 | 2.317000  |
| 1                | 2.007239                | 2.137157 | 1.546603  |
| 6                | 1.995450                | 2.821159 | 0.707973  |
| 6                | 1.039824                | 2.788638 | -0.226618 |
| 1                | -0.543124               | 0.847988 | 2.771163  |
| 1                | 2.785106                | 3.557506 | 0.643781  |



|    |           |           |           |
|----|-----------|-----------|-----------|
| 8  | -0.005108 | 1.901093  | -0.244101 |
| 6  | 0.955550  | 3.740194  | -1.385167 |
| 1  | -0.000109 | 4.273411  | -1.365762 |
| 1  | 1.002810  | 3.192927  | -2.331947 |
| 1  | 1.765994  | 4.469300  | -1.356601 |
| 32 | -0.067561 | 0.260084  | 0.535510  |
| 6  | -1.880985 | -0.301994 | 0.095405  |
| 6  | -2.329115 | -1.572829 | 0.481194  |
| 6  | -2.753206 | 0.546971  | -0.598105 |
| 6  | -3.626110 | -1.985998 | 0.182185  |
| 1  | -1.668536 | -2.247443 | 1.016773  |
| 6  | -4.050325 | 0.131360  | -0.897474 |
| 1  | -2.412727 | 1.529710  | -0.901976 |
| 6  | -4.487396 | -1.133680 | -0.508031 |
| 1  | -3.963243 | -2.971027 | 0.485555  |
| 1  | -4.718746 | 0.795092  | -1.434966 |
| 1  | -5.496108 | -1.455809 | -0.742127 |
| 6  | 1.406439  | -0.870696 | -0.035871 |
| 6  | 2.315159  | -1.378072 | 0.901043  |
| 6  | 1.563503  | -1.197957 | -1.388688 |
| 6  | 3.365119  | -2.197621 | 0.488380  |
| 1  | 2.200103  | -1.129282 | 1.949626  |
| 6  | 2.615096  | -2.014805 | -1.799407 |
| 1  | 0.867661  | -0.817128 | -2.129588 |
| 6  | 3.516204  | -2.515483 | -0.860324 |
| 1  | 4.065446  | -2.585825 | 1.219790  |
| 1  | 2.730270  | -2.261292 | -2.849139 |
| 1  | 4.333910  | -3.152244 | -1.179681 |

B3LYP/6-311++G(d,p) = -2808.9297463 Hartrees

Low frequencies = 19.6153                      25.2904                      32.4791                      40.9759                      45.4227  
62.9019                      102.0378                      132.8018                      152.8123                      181.2340

### Transition State: Addition of Water

#### Formaldehyde (C)

| Atomic<br>Number | Coordinates (Angstroms) |           |           |
|------------------|-------------------------|-----------|-----------|
|                  | X                       | Y         | Z         |
| 8                | 1.140698                | -0.161907 | -0.110665 |
| 1                | 0.219105                | -0.909638 | -0.040029 |
| 1                | 1.657560                | -0.113297 | 0.707339  |
| 8                | -1.021943               | -0.493813 | 0.026629  |
| 6                | -0.365074               | 0.633315  | 0.000550  |
| 1                | -0.353873               | 1.233632  | -0.917444 |
| 1                | -0.282388               | 1.235182  | 0.919123  |

B3LYP/6-311++G(d,p) = -190.9428732 Hartrees

Low frequencies = -1778.6941                      417.3698                      513.7036                      718.7125  
762.4836                      1003.9138                      1195.7172                      1275.1944                      1305.0642  
1354.9291

### Formaldehyde (Si)

| Atomic<br>Number | Coordinates (Angstroms) |           |           |
|------------------|-------------------------|-----------|-----------|
|                  | X                       | Y         | Z         |
| 8                | -1.348785               | 0.109045  | -0.110196 |
| 1                | -0.687711               | 0.998007  | -0.026024 |
| 1                | -1.986797               | 0.012743  | 0.609520  |
| 8                | 0.796295                | 1.017527  | 0.023364  |
| 1                | 0.612812                | -1.367163 | -1.193763 |
| 1                | 0.450750                | -1.354407 | 1.233519  |
| 14               | 0.430776                | -0.521554 | 0.005100  |

B3LYP/6-311++G(d,p) = -442.430122 Hartrees

Low frequencies = -994.4548                      439.8173                      468.1667                      519.0098                      651.0093  
727.5324                      795.2839                      886.5656                      1004.9064                      1104.1075

### Formaldehyde (Ge)

| Atomic<br>Number | Coordinates (Angstroms) |           |           |
|------------------|-------------------------|-----------|-----------|
|                  | X                       | Y         | Z         |
| 8                | -1.577160               | -0.386544 | -0.110411 |
| 1                | -1.310938               | 0.702376  | -0.030425 |
| 1                | -2.093623               | -0.709172 | 0.639679  |
| 8                | -0.067739               | 1.426598  | 0.021060  |
| 1                | 0.979261                | -0.885288 | -1.271110 |
| 1                | 0.869538                | -0.940246 | 1.292144  |
| 32               | 0.459842                | -0.202753 | 0.002641  |

B3LYP/6-311++G(d,p) = -2229.8850181 Hartrees

Low frequencies = -1050.2529                      343.1457                      434.7899                      475.8157  
559.0546                      685.9737                      737.2186                      775.1631                      841.3455                      894.0229

### Acetone (C)

| Atomic<br>Number | Coordinates (Angstroms) |           |           |
|------------------|-------------------------|-----------|-----------|
|                  | X                       | Y         | Z         |
| 8                | 1.380423                | -0.165504 | -0.720673 |
| 1                | 1.420283                | -0.157570 | 0.512034  |
| 1                | 1.696397                | 0.651716  | -1.129212 |
| 6                | -0.765798               | 1.357064  | -0.208832 |
| 8                | 0.470135                | -0.084569 | 1.295471  |
| 6                | -0.970491               | -1.205725 | -0.294533 |
| 1                | -1.867709               | -1.282907 | 0.329815  |
| 1                | -1.275400               | -1.129908 | -1.338952 |
| 1                | -0.371898               | -2.102970 | -0.143272 |
| 1                | -1.664756               | 1.513974  | 0.397504  |

|   |           |          |           |
|---|-----------|----------|-----------|
| 1 | -0.059438 | 2.149016 | 0.043212  |
| 1 | -1.050052 | 1.414321 | -1.260999 |
| 6 | -0.202360 | 0.006146 | 0.168612  |

B3LYP/6-311++G(d,p) = -269.6139819 Hartrees  
Low frequencies = -1791.5201                      193.2673                      231.8859                      242.5125  
297.4726                      372.9349                      411.1956                      478.0984                      515.4952  
670.1109

### Acetone (Si)

-----  
Atomic                      Coordinates (Angstroms)  
Number                      X                      Y                      Z  
-----

|    |           |           |           |
|----|-----------|-----------|-----------|
| 8  | 1.326048  | -0.224913 | -1.053965 |
| 1  | 1.742048  | -0.297866 | -0.035359 |
| 1  | 1.682321  | 0.519725  | -1.555364 |
| 6  | -0.811534 | 1.711805  | -0.086260 |
| 8  | 1.034038  | -0.246966 | 1.271462  |
| 6  | -1.344625 | -1.340674 | -0.216451 |
| 1  | -2.130914 | -1.381051 | 0.544317  |
| 1  | -1.824758 | -1.166559 | -1.183468 |
| 1  | -0.850994 | -2.314440 | -0.237173 |
| 1  | -1.586198 | 1.924558  | 0.657979  |
| 1  | -0.038269 | 2.475886  | 0.024660  |
| 1  | -1.273217 | 1.809460  | -1.073433 |
| 14 | -0.118840 | -0.001534 | 0.209581  |

B3LYP/6-311++G(d,p) = -521.119577 Hartrees  
Low frequencies = -871.0936                      113.4887                      137.7348                      165.6409  
207.0914                      241.9048                      275.7085                      404.9083                      470.7701                      621.6149

### Acetone (Ge)

-----  
Atomic                      Coordinates (Angstroms)  
Number                      X                      Y                      Z  
-----

|    |           |           |           |
|----|-----------|-----------|-----------|
| 8  | -1.524202 | -0.131165 | 1.108651  |
| 1  | -1.851095 | -0.132396 | 0.039357  |
| 1  | -1.849364 | 0.640077  | 1.589594  |
| 6  | 1.003782  | 1.720717  | 0.198523  |
| 8  | -1.197614 | -0.111698 | -1.240358 |
| 6  | 1.215296  | -1.569041 | 0.279676  |
| 32 | 0.136612  | -0.000438 | -0.164679 |
| 1  | 1.989519  | -1.699398 | -0.480528 |
| 1  | 1.694336  | -1.446301 | 1.252633  |
| 1  | 0.576154  | -2.451584 | 0.288520  |
| 1  | 1.823727  | 1.859380  | -0.510933 |
| 1  | 0.289462  | 2.533549  | 0.066070  |
| 1  | 1.415746  | 1.743540  | 1.209476  |

B3LYP/6-311++G(d,p) = -2308.5669008 Hartrees

Low frequencies = -940.0396            77.7522            101.3911            129.3794  
166.2023            180.9594            209.5664            315.7051            480.5039  
553.0562

#### 4-Dimethyl-3-pentanone (C)

| Atomic<br>Number | Coordinates (Angstroms) |           |           |
|------------------|-------------------------|-----------|-----------|
|                  | X                       | Y         | Z         |
| 8                | -0.443738               | -1.076719 | 1.585697  |
| 1                | -0.567624               | -1.895126 | 0.663223  |
| 1                | -1.291476               | -0.752984 | 1.917320  |
| 6                | -1.035699               | 0.583867  | -0.518982 |
| 1                | -0.746926               | 0.779554  | -1.562792 |
| 8                | -0.346252               | -1.736637 | -0.530452 |
| 6                | 1.464365                | -0.257311 | -0.010875 |
| 1                | 1.851637                | -1.240024 | 0.272541  |
| 6                | 2.013012                | 0.057578  | -1.417609 |
| 1                | 3.105900                | 0.055535  | -1.393072 |
| 1                | 1.689545                | -0.689392 | -2.145510 |
| 1                | 1.694244                | 1.045507  | -1.764427 |
| 6                | 1.963120                | 0.749839  | 1.033574  |
| 1                | 1.467641                | 0.597233  | 1.993036  |
| 1                | 3.036464                | 0.599322  | 1.181901  |
| 1                | 1.826922                | 1.787869  | 0.726225  |
| 6                | -2.484499               | 0.074530  | -0.550815 |
| 1                | -3.120497               | 0.804687  | -1.057360 |
| 1                | -2.558093               | -0.878869 | -1.071587 |
| 1                | -2.887334               | -0.054288 | 0.459949  |
| 6                | -0.940655               | 1.907773  | 0.251857  |
| 1                | -1.054990               | 1.751183  | 1.328369  |
| 1                | 0.001291                | 2.428862  | 0.088161  |
| 1                | -1.743326               | 2.575154  | -0.072568 |
| 6                | -0.043554               | -0.517506 | -0.121380 |

B3LYP/6-311++G(d,p) = -426.9021915 Hartrees  
Low frequencies = -1769.1995            23.6594            83.5567            177.1296            192.5766  
198.0386            210.6124            222.8783            254.9685            284.7198

#### 4-Dimethyl-3-pentanone (Si)

| Atomic<br>Number | Coordinates (Angstroms) |           |           |
|------------------|-------------------------|-----------|-----------|
|                  | X                       | Y         | Z         |
| 8                | -0.504684               | -1.506242 | 1.375156  |
| 1                | -0.720336               | -2.169240 | 0.523438  |
| 1                | -1.300648               | -1.284425 | 1.875691  |
| 6                | -1.246787               | 0.913385  | -0.391319 |
| 1                | -1.051492               | 1.300057  | -1.403285 |
| 8                | -0.511825               | -1.940190 | -0.934276 |
| 6                | 1.776118                | -0.171262 | -0.123550 |

|    |           |           |           |
|----|-----------|-----------|-----------|
| 1  | 2.237196  | -1.159031 | -0.249291 |
| 6  | 2.246075  | 0.714416  | -1.297292 |
| 1  | 3.334607  | 0.833034  | -1.273887 |
| 1  | 1.986308  | 0.283398  | -2.268760 |
| 1  | 1.811010  | 1.718022  | -1.248678 |
| 6  | 2.236531  | 0.394269  | 1.232990  |
| 1  | 1.945716  | -0.255000 | 2.062230  |
| 1  | 3.327978  | 0.488364  | 1.251448  |
| 1  | 1.824669  | 1.388894  | 1.424914  |
| 6  | -2.718016 | 0.455514  | -0.359660 |
| 1  | -3.385673 | 1.285527  | -0.613868 |
| 1  | -2.901477 | -0.362574 | -1.058484 |
| 1  | -3.010106 | 0.111448  | 0.639940  |
| 6  | -0.994043 | 2.063957  | 0.600970  |
| 1  | -1.124512 | 1.741230  | 1.639765  |
| 1  | 0.011074  | 2.481545  | 0.509998  |
| 1  | -1.703774 | 2.880122  | 0.427682  |
| 14 | -0.067695 | -0.566542 | -0.267052 |

B3LYP/6-311++G(d,p) = -678.40089589 Hartrees

|                             |          |          |          |          |
|-----------------------------|----------|----------|----------|----------|
| Low frequencies = -838.8517 | 34.0856  | 53.5386  | 116.9161 | 136.3673 |
| 138.3023                    | 186.6593 | 218.7950 | 226.4005 | 231.3388 |

#### 4-Dimethyl-3-pentanone (Ge)

| Atomic<br>Number | Coordinates (Angstroms) |           |           |
|------------------|-------------------------|-----------|-----------|
|                  | X                       | Y         | Z         |
| 8                | -0.511200               | -1.562158 | 1.466825  |
| 1                | -0.701326               | -2.151300 | 0.538118  |
| 1                | -1.327094               | -1.404381 | 1.957954  |
| 6                | -1.333947               | 1.092426  | -0.362627 |
| 1                | -1.174638               | 1.467512  | -1.382624 |
| 8                | -0.550249               | -1.956040 | -0.877917 |
| 6                | 1.897141                | -0.062480 | -0.068442 |
| 1                | 2.330902                | -1.058794 | -0.199290 |
| 6                | 2.395770                | 0.845716  | -1.204520 |
| 1                | 3.483084                | 0.966056  | -1.141339 |
| 1                | 2.171488                | 0.434212  | -2.192892 |
| 1                | 1.957645                | 1.847611  | -1.148555 |
| 6                | 2.284783                | 0.470418  | 1.317814  |
| 1                | 1.942547                | -0.191711 | 2.115971  |
| 1                | 3.375121                | 0.552757  | 1.395041  |
| 1                | 1.872195                | 1.466441  | 1.503159  |
| 6                | -2.777467               | 0.580409  | -0.264322 |
| 1                | -3.483537               | 1.381719  | -0.508537 |
| 1                | -2.956989               | -0.256507 | -0.941836 |
| 1                | -3.012998               | 0.244533  | 0.751371  |
| 6                | -1.046480               | 2.233762  | 0.623302  |
| 1                | -1.145127               | 1.905247  | 1.662730  |
| 1                | -0.043935               | 2.650676  | 0.499469  |
| 1                | -1.760886               | 3.051170  | 0.473675  |

32      -0.048552   -0.428787   -0.260653

B3LYP/6-311++G(d,p) = -2465.8524445 Hartrees

Low frequencies = -910.7730                      36.0233                      43.0651                      92.5301                      107.2419  
108.1124                      162.3087                      221.5637                      226.4615                      231.4198

### Diphenyl ketone (C)

| Atomic<br>Number | Coordinates (Angstroms) |           |           |
|------------------|-------------------------|-----------|-----------|
|                  | X                       | Y         | Z         |
| 8                | -0.042269               | 1.981674  | 1.453157  |
| 1                | 0.048726                | 2.547559  | 0.284154  |
| 1                | 0.769981                | 1.933177  | 1.974182  |
| 8                | -0.066477               | 2.077867  | -0.771542 |
| 6                | 1.283871                | 0.207000  | -0.068425 |
| 6                | 1.567467                | -0.741253 | 0.925189  |
| 6                | 2.263760                | 0.522130  | -1.015622 |
| 6                | 2.810328                | -1.363519 | 0.964833  |
| 1                | 0.822810                | -0.967285 | 1.679745  |
| 6                | 3.502317                | -0.115984 | -0.983024 |
| 1                | 2.038098                | 1.265930  | -1.769189 |
| 6                | 3.778275                | -1.057562 | 0.005764  |
| 1                | 3.027658                | -2.084113 | 1.745152  |
| 1                | 4.252582                | 0.127395  | -1.726770 |
| 1                | 4.744903                | -1.547762 | 0.035697  |
| 6                | -1.303383               | 0.130620  | -0.113795 |
| 6                | -2.514001               | 0.833545  | -0.010919 |
| 6                | -1.335103               | -1.262559 | -0.253812 |
| 6                | -3.723549               | 0.153851  | -0.017602 |
| 1                | -2.487452               | 1.910794  | 0.082993  |
| 6                | -2.552812               | -1.940941 | -0.276978 |
| 1                | -0.414676               | -1.818237 | -0.373352 |
| 6                | -3.746755               | -1.236861 | -0.151160 |
| 1                | -4.652101               | 0.705286  | 0.076467  |
| 1                | -2.565322               | -3.018044 | -0.398790 |
| 1                | -4.693418               | -1.765531 | -0.164108 |
| 6                | -0.034050               | 0.910617  | -0.154300 |

B3LYP/6-311++G(d,p) = -653.1728775 Hartrees

Low frequencies = -1660.3623                      33.0657                      59.8991                      89.6981                      114.5383  
139.3942                      218.4888                      233.5962                      243.9240                      291.2403

### Diphenyl ketone (Si)

| Atomic<br>Number | Coordinates (Angstroms) |          |           |
|------------------|-------------------------|----------|-----------|
|                  | X                       | Y        | Z         |
| 8                | -0.075174               | 2.232488 | 1.320759  |
| 1                | 0.046418                | 2.856439 | 0.415960  |
| 1                | 0.683720                | 2.275840 | 1.917259  |
| 8                | 0.065726                | 2.447826 | -1.000836 |

|    |           |           |           |
|----|-----------|-----------|-----------|
| 6  | 1.549489  | 0.050636  | -0.048848 |
| 6  | 1.647547  | -1.084785 | 0.773807  |
| 6  | 2.692130  | 0.464778  | -0.755135 |
| 6  | 2.848576  | -1.781657 | 0.889314  |
| 1  | 0.781658  | -1.429785 | 1.329951  |
| 6  | 3.891390  | -0.236919 | -0.647260 |
| 1  | 2.630282  | 1.341457  | -1.391439 |
| 6  | 3.970502  | -1.359153 | 0.176161  |
| 1  | 2.909677  | -2.653874 | 1.530905  |
| 1  | 4.762415  | 0.091190  | -1.203723 |
| 1  | 4.903917  | -1.904640 | 0.262289  |
| 6  | -1.572412 | 0.054685  | -0.120132 |
| 6  | -2.768785 | 0.632427  | 0.339235  |
| 6  | -1.609278 | -1.272647 | -0.577334 |
| 6  | -3.955085 | -0.095393 | 0.351807  |
| 1  | -2.771708 | 1.658089  | 0.691426  |
| 6  | -2.798785 | -2.000133 | -0.574494 |
| 1  | -0.705389 | -1.746239 | -0.946009 |
| 6  | -3.971957 | -1.413186 | -0.106064 |
| 1  | -4.867476 | 0.364938  | 0.714621  |
| 1  | -2.808407 | -3.022186 | -0.936813 |
| 1  | -4.897556 | -1.978265 | -0.100083 |
| 14 | -0.009426 | 1.068043  | -0.217862 |

B3LYP/6-311++G(d,p) = -904.6759713 Hartrees

|                             |          |          |          |          |          |
|-----------------------------|----------|----------|----------|----------|----------|
| Low frequencies = -909.6634 | 25.0982  | 44.7769  | 64.0285  |          |          |
| 85.7066                     | 110.9121 | 139.5284 | 192.3615 | 238.5503 | 245.9635 |

### Diphenyl ketone (Ge)

| Atomic<br>Number | Coordinates (Angstroms) |           |           |
|------------------|-------------------------|-----------|-----------|
|                  | X                       | Y         | Z         |
| 8                | 0.102623                | -2.165978 | 1.475001  |
| 1                | -0.019004               | -2.753025 | 0.526029  |
| 1                | -0.668051               | -2.239594 | 2.051926  |
| 8                | -0.065817               | -2.458738 | -0.864394 |
| 32               | 0.009048                | -0.881651 | -0.185194 |
| 6                | -1.648129               | 0.135718  | -0.035802 |
| 6                | -1.754389               | 1.317903  | 0.710137  |
| 6                | -2.782080               | -0.366456 | -0.690082 |
| 6                | -2.974635               | 1.985639  | 0.800773  |
| 1                | -0.890651               | 1.718172  | 1.230502  |
| 6                | -3.999279               | 0.307167  | -0.603985 |
| 1                | -2.704756               | -1.285192 | -1.262111 |
| 6                | -4.095581               | 1.481806  | 0.141229  |
| 1                | -3.050995               | 2.896605  | 1.384064  |
| 1                | -4.871108               | -0.084592 | -1.116089 |
| 1                | -5.043497               | 2.004035  | 0.209724  |
| 6                | 1.664498                | 0.138047  | -0.107789 |
| 6                | 2.858054                | -0.513455 | 0.233101  |

|   |          |           |           |
|---|----------|-----------|-----------|
| 6 | 1.698556 | 1.498239  | -0.441507 |
| 6 | 4.060128 | 0.188777  | 0.252159  |
| 1 | 2.847530 | -1.567999 | 0.484152  |
| 6 | 2.905337 | 2.197534  | -0.429631 |
| 1 | 0.788592 | 2.018013  | -0.721734 |
| 6 | 4.084757 | 1.543914  | -0.079160 |
| 1 | 4.978395 | -0.321230 | 0.521183  |
| 1 | 2.923257 | 3.248739  | -0.695033 |
| 1 | 5.022894 | 2.087629  | -0.067904 |

B3LYP/6-311++G(d,p) = -2692.1229408 Hartrees

Low frequencies = -987.4818                      18.6018                      38.9245                      59.2712                      74.5523  
94.3013                      127.3309                      172.6046                      216.1976                      228.8359

### Products: Addition of Water

#### Formaldehyde (C)

| Atomic<br>Number | Coordinates (Angstroms) |           |           |
|------------------|-------------------------|-----------|-----------|
|                  | X                       | Y         | Z         |
| 8                | 1.182440                | -0.226130 | -0.139991 |
| 1                | 1.350561                | -0.821784 | 0.597372  |
| 1                | -1.350688               | -0.821556 | 0.597492  |
| 8                | -1.182475               | -0.226116 | -0.140018 |
| 6                | 0.000058                | 0.505021  | 0.094588  |
| 1                | 0.000087                | 1.312648  | -0.634666 |
| 1                | -0.000030               | 0.918534  | 1.112348  |

B3LYP/6-311++G(d,p) = -191.0149366 Hartrees

Low frequencies = 185.7712                      391.1678                      536.7422                      994.5335  
1040.0445                      1053.0622                      1154.4089                      1370.9250                      1393.6065  
1442.0381

#### Formaldehyde (Si)

| Atomic<br>Number | Coordinates (Angstroms) |           |           |
|------------------|-------------------------|-----------|-----------|
|                  | X                       | Y         | Z         |
| 8                | 1.392298                | -0.433858 | -0.128375 |
| 1                | 1.732946                | -0.965676 | 0.593242  |
| 1                | -1.733033               | -0.965562 | 0.593274  |
| 8                | -1.392283               | -0.433874 | -0.128390 |
| 1                | 0.000014                | 1.406117  | -1.079539 |
| 1                | -0.000022               | 1.096706  | 1.381484  |
| 14               | -0.000002               | 0.455019  | 0.040404  |

B3LYP/6-311++G(d,p) = -442.5123251 Hartrees

Low frequencies = 117.4933                      280.9082                      336.9574                      607.8206                      712.9798  
796.9986                      830.0984                      878.3152                      901.4919                      957.2518

#### Formaldehyde (Ge)



| Atomic<br>Number | Coordinates (Angstroms) |           |           |
|------------------|-------------------------|-----------|-----------|
|                  | X                       | Y         | Z         |
| 8                | -1.483117               | 0.668409  | -0.130331 |
| 1                | -1.725438               | 1.153705  | 0.663782  |
| 1                | 1.725553                | 1.153544  | 0.663832  |
| 8                | 1.483115                | 0.668418  | -0.130350 |
| 1                | -0.000024               | -1.228562 | -1.212365 |
| 1                | 0.000021                | -1.029328 | 1.392197  |
| 32               | -0.000003               | -0.335749 | 0.018063  |

B3LYP/6-311++G(d,p) = -2229.9571147 Hartrees

|                           |          |          |          |          |
|---------------------------|----------|----------|----------|----------|
| Low frequencies = 41.2864 | 222.0951 | 264.4509 | 527.7760 | 663.0761 |
| 664.5544                  | 672.5802 | 805.7305 | 846.2669 | 884.7349 |

### Acetone (C)

| Atomic<br>Number | Coordinates (Angstroms) |           |           |
|------------------|-------------------------|-----------|-----------|
|                  | X                       | Y         | Z         |
| 8                | -0.198025               | -0.830016 | 1.155022  |
| 1                | -0.469651               | -0.266149 | 1.886784  |
| 1                | -0.685282               | -1.533803 | -0.991527 |
| 1                | -2.095636               | 0.439173  | -0.215465 |
| 6                | -1.143131               | 0.974227  | -0.173722 |
| 6                | 0.011892                | -0.020491 | -0.013312 |
| 1                | -1.021848               | 1.542945  | -1.097548 |
| 1                | -1.178441               | 1.680880  | 0.661589  |
| 8                | 0.055101                | -0.923802 | -1.093616 |
| 6                | 1.374786                | 0.661532  | 0.038792  |
| 1                | 1.568838                | 1.198071  | -0.892449 |
| 1                | 2.146992                | -0.095478 | 0.179695  |
| 1                | 1.417133                | 1.373298  | 0.867131  |

B3LYP/6-311++G(d,p) = -269.6773394 Hartrees

|                            |          |          |          |
|----------------------------|----------|----------|----------|
| Low frequencies = 184.0345 | 221.8546 | 265.2524 | 284.2397 |
| 347.9070                   | 366.1369 | 443.0283 | 503.6702 |
| 769.2415                   |          |          | 528.2501 |

### Acetone (Si)

| Atomic<br>Number | Coordinates (Angstroms) |           |           |
|------------------|-------------------------|-----------|-----------|
|                  | X                       | Y         | Z         |
| 8                | -0.270760               | -1.030801 | 1.309391  |
| 1                | -0.823496               | -0.730350 | 2.032996  |
| 1                | -0.318388               | -1.828314 | -1.366602 |
| 1                | -2.392059               | 0.537303  | -0.368289 |
| 6                | -1.465645               | 1.106692  | -0.245872 |
| 1                | -1.333541               | 1.721164  | -1.141381 |
| 1                | -1.598880               | 1.786906  | 0.601995  |
| 8                | 0.228089                | -1.041708 | -1.304144 |

|    |          |           |           |
|----|----------|-----------|-----------|
| 6  | 1.606157 | 0.917920  | 0.179102  |
| 1  | 1.836001 | 1.477381  | -0.732299 |
| 1  | 2.434718 | 0.231409  | 0.371031  |
| 1  | 1.555569 | 1.630392  | 1.007925  |
| 14 | 0.009884 | -0.028107 | -0.003338 |

B3LYP/6-311++G(d,p) = -521.1990874 Hartrees

|                   |          |          |          |          |
|-------------------|----------|----------|----------|----------|
| Low frequencies = | 118.4969 | 136.4316 | 153.9343 | 181.1853 |
| 203.2099          | 234.9577 | 256.2197 | 311.3153 | 338.7419 |
| 623.6760          |          |          |          |          |

#### Acetone (Ge)

| Atomic<br>Number | Coordinates (Angstroms) |           |           |
|------------------|-------------------------|-----------|-----------|
|                  | X                       | Y         | Z         |
| 8                | 0.299772                | -1.048256 | 1.430956  |
| 1                | -0.420138               | -1.657898 | 1.620503  |
| 1                | 0.419976                | -1.659416 | -1.619099 |
| 1                | -2.506464               | 0.332450  | 0.209942  |
| 6                | -1.662450               | 1.023050  | 0.169114  |
| 1                | -1.791421               | 1.676988  | -0.695391 |
| 1                | -1.649865               | 1.628584  | 1.076934  |
| 8                | -0.299874               | -1.049563 | -1.430034 |
| 6                | 1.662587                | 1.022741  | -0.169888 |
| 1                | 1.650569                | 1.626660  | -1.078803 |
| 1                | 2.506603                | 0.332054  | -0.209027 |
| 1                | 1.790949                | 1.678327  | 0.693453  |
| 32               | -0.000007               | 0.017189  | -0.000039 |

B3LYP/6-311++G(d,p) = -2308.63946082 Hartrees

|                   |          |          |          |          |
|-------------------|----------|----------|----------|----------|
| Low frequencies = | 96.6477  | 103.1494 | 155.7904 | 181.0417 |
| 191.4530          | 219.0553 | 226.8134 | 231.9460 | 343.0783 |
| 569.8560          |          |          |          |          |

#### 4-Dimethyl-3-pentanone (C)

| Atomic<br>Number | Coordinates (Angstroms) |           |           |
|------------------|-------------------------|-----------|-----------|
|                  | X                       | Y         | Z         |
| 8                | 0.068785                | -0.428069 | 1.510452  |
| 1                | -0.172779               | 0.440300  | 1.847550  |
| 1                | -0.567260               | -2.240441 | 0.295482  |
| 6                | -1.276192               | 0.297085  | -0.438214 |
| 1                | -1.052619               | 0.621332  | -1.460993 |
| 8                | 0.033952                | -1.775105 | -0.297153 |
| 6                | 1.340402                | 0.155200  | -0.535007 |
| 1                | 1.264773                | -0.073694 | -1.605035 |
| 6                | -1.689100               | 1.536303  | 0.379097  |
| 1                | -0.879308               | 2.250528  | 0.533876  |
| 1                | -2.491782               | 2.069184  | -0.137486 |
| 1                | -2.087443               | 1.246908  | 1.357819  |

|   |           |           |           |
|---|-----------|-----------|-----------|
| 6 | -2.474526 | -0.663002 | -0.511172 |
| 1 | -3.362044 | -0.125580 | -0.856602 |
| 1 | -2.294027 | -1.488482 | -1.200167 |
| 1 | -2.711723 | -1.077364 | 0.474978  |
| 6 | 2.571546  | -0.573996 | 0.022574  |
| 1 | 2.484433  | -1.652393 | -0.105485 |
| 1 | 3.472215  | -0.234927 | -0.497349 |
| 1 | 2.696608  | -0.367634 | 1.088628  |
| 6 | 1.519112  | 1.673010  | -0.390903 |
| 1 | 2.480662  | 1.966672  | -0.820144 |
| 1 | 0.746945  | 2.245177  | -0.908798 |
| 1 | 1.533250  | 1.980736  | 0.660316  |
| 6 | 0.028457  | -0.413754 | 0.078129  |

B3LYP/6-311++G(d,p) = -426.9632436 Hartrees

|                           |          |          |          |
|---------------------------|----------|----------|----------|
| Low frequencies = 70.4397 | 88.3431  | 193.4792 | 195.0313 |
| 223.6821                  | 226.5894 | 260.1716 | 275.4298 |
| 304.2655                  |          |          | 296.6122 |

#### 4-Dimethyl-3-pentanone (Si)

| Atomic<br>Number | Coordinates (Angstroms) |           |           |
|------------------|-------------------------|-----------|-----------|
|                  | X                       | Y         | Z         |
| 8                | 0.027967                | -0.512423 | 1.768868  |
| 1                | -0.370021               | 0.197836  | 2.275934  |
| 1                | -0.436821               | -2.671683 | 0.066078  |
| 6                | -1.561479               | 0.429821  | -0.506621 |
| 1                | -1.342137               | 0.769373  | -1.528606 |
| 8                | 0.074138                | -2.021113 | -0.420902 |
| 6                | 1.616494                | 0.323816  | -0.585470 |
| 1                | 1.549738                | 0.198301  | -1.675705 |
| 6                | -1.941038               | 1.671010  | 0.326866  |
| 1                | -1.130804               | 2.401882  | 0.394781  |
| 1                | -2.805152               | 2.182548  | -0.110709 |
| 1                | -2.227197               | 1.391955  | 1.347682  |
| 6                | -2.754125               | -0.544150 | -0.587482 |
| 1                | -3.645688               | -0.034628 | -0.969889 |
| 1                | -2.545702               | -1.389502 | -1.247268 |
| 1                | -3.011232               | -0.944587 | 0.399630  |
| 6                | 2.855727                | -0.452727 | -0.098268 |
| 1                | 2.789402                | -1.513271 | -0.349794 |
| 1                | 3.766413                | -0.051505 | -0.557049 |
| 1                | 2.969950                | -0.373571 | 0.987220  |
| 6                | 1.758438                | 1.829357  | -0.292080 |
| 1                | 2.693124                | 2.216542  | -0.712191 |
| 1                | 0.942552                | 2.418087  | -0.720852 |
| 1                | 1.786013                | 2.026006  | 0.785233  |
| 14               | 0.025473                | -0.435589 | 0.092150  |

B3LYP/6-311++G(d,p) = -678.4805304 Hartrees

|                           |         |          |          |
|---------------------------|---------|----------|----------|
| Low frequencies = 38.4193 | 42.7832 | 109.4131 | 143.0274 |
|---------------------------|---------|----------|----------|

165.5372            168.9240            195.2656            203.0524            230.2490  
232.5794

#### 4-Dimethyl-3-pentanone (Ge)

| Atomic<br>Number | Coordinates (Angstroms) |           |           |
|------------------|-------------------------|-----------|-----------|
|                  | X                       | Y         | Z         |
| 8                | 0.125650                | -0.370643 | 1.833678  |
| 1                | -0.570948               | -0.879913 | 2.259150  |
| 1                | 0.628389                | -2.596428 | -0.244000 |
| 6                | -1.740061               | 0.408918  | -0.591701 |
| 1                | -1.723716               | 0.253303  | -1.677020 |
| 8                | -0.102344               | -2.046954 | -0.543232 |
| 6                | 1.685855                | 0.541781  | -0.533028 |
| 1                | 1.528221                | 0.847828  | -1.574294 |
| 32               | -0.007597               | -0.325868 | 0.023169  |
| 6                | -1.878546               | 1.911919  | -0.307967 |
| 1                | -1.094015               | 2.499793  | -0.792465 |
| 1                | -2.840517               | 2.282899  | -0.679265 |
| 1                | -1.839683               | 2.122751  | 0.765154  |
| 6                | -2.911307               | -0.395382 | -0.007278 |
| 1                | -3.861381               | -0.044925 | -0.426364 |
| 1                | -2.818218               | -1.461275 | -0.225562 |
| 1                | -2.976582               | -0.272961 | 1.079293  |
| 6                | 2.853483                | -0.456619 | -0.491705 |
| 1                | 2.682065                | -1.317262 | -1.143836 |
| 1                | 3.779335                | 0.026604  | -0.823615 |
| 1                | 3.024353                | -0.825102 | 0.524478  |
| 6                | 1.981374                | 1.789877  | 0.314887  |
| 1                | 2.915364                | 2.258900  | -0.014795 |
| 1                | 1.191075                | 2.541223  | 0.238163  |
| 1                | 2.088113                | 1.530149  | 1.370767  |

B3LYP/6-311++G(d,p) = -2465.9246572 Hartrees

Low frequencies = 25.5005            42.3211            91.2352            117.7749  
141.9544            172.1915            203.9551            214.5293            231.7733  
237.7375

#### Diphenyl ketone (C)

| Atomic<br>Number | Coordinates (Angstroms) |           |           |
|------------------|-------------------------|-----------|-----------|
|                  | X                       | Y         | Z         |
| 8                | 0.078335                | 1.972080  | -1.159875 |
| 1                | -0.758755               | 2.445718  | -1.234034 |
| 1                | 0.758718                | 2.445796  | 1.233670  |
| 8                | -0.078400               | 1.972189  | 1.159524  |
| 6                | 0.000000                | 1.156162  | -0.000139 |
| 6                | 1.269835                | 0.300045  | 0.033333  |
| 6                | 2.155284                | 0.252798  | -1.045173 |
| 6                | 1.547225                | -0.456275 | 1.177997  |

|   |           |           |           |
|---|-----------|-----------|-----------|
| 6 | 3.303952  | -0.536885 | -0.977122 |
| 1 | 1.946972  | 0.839713  | -1.929495 |
| 6 | 2.692965  | -1.243024 | 1.243553  |
| 1 | 0.862832  | -0.426140 | 2.017869  |
| 6 | 3.576228  | -1.286109 | 0.164264  |
| 1 | 3.986339  | -0.562759 | -1.819584 |
| 1 | 2.896022  | -1.824250 | 2.136161  |
| 1 | 4.468512  | -1.900072 | 0.214684  |
| 6 | -1.269800 | 0.299968  | -0.033400 |
| 6 | -2.155294 | 0.253041  | 1.045086  |
| 6 | -1.547157 | -0.456641 | -1.177864 |
| 6 | -3.303982 | -0.536617 | 0.977181  |
| 1 | -1.947014 | 0.840106  | 1.929317  |
| 6 | -2.692936 | -1.243373 | -1.243280 |
| 1 | -0.862703 | -0.426772 | -2.017695 |
| 6 | -3.576243 | -1.286137 | -0.164041 |
| 1 | -3.986401 | -0.562274 | 1.819622  |
| 1 | -2.895936 | -1.824848 | -2.135739 |
| 1 | -4.468536 | -1.900096 | -0.214336 |

B3LYP/6-311++G(d,p) = -653.237994 Hartrees

|                   |          |          |          |          |          |
|-------------------|----------|----------|----------|----------|----------|
| Low frequencies = | 31.2952  | 34.8095  | 61.4536  | 155.8801 |          |
| 210.3552          | 219.7174 | 273.8905 | 313.1863 | 324.7252 | 351.5631 |

### Diphenyl ketone (Si)

| Atomic<br>Number | Coordinates (Angstroms) |           |           |
|------------------|-------------------------|-----------|-----------|
|                  | X                       | Y         | Z         |
| 8                | -0.053754               | 1.842526  | 1.663695  |
| 1                | 0.749986                | 2.229411  | 2.018550  |
| 1                | 0.731684                | 2.718325  | -1.331591 |
| 8                | -0.061299               | 2.226676  | -1.106111 |
| 6                | -1.596469               | 0.160162  | 0.021360  |
| 6                | -2.177030               | -0.425428 | 1.157896  |
| 6                | -2.221426               | -0.037178 | -1.220344 |
| 6                | -3.339173               | -1.187473 | 1.056712  |
| 1                | -1.725894               | -0.270103 | 2.131954  |
| 6                | -3.383830               | -0.798845 | -1.323843 |
| 1                | -1.804171               | 0.421845  | -2.109966 |
| 6                | -3.943146               | -1.377108 | -0.185373 |
| 1                | -3.776470               | -1.627711 | 1.946293  |
| 1                | -3.855907               | -0.936367 | -2.290609 |
| 1                | -4.848517               | -1.969026 | -0.264970 |
| 6                | 1.579993                | 0.143145  | 0.016530  |
| 6                | 2.205578                | -0.064269 | -1.224652 |
| 6                | 2.170405                | -0.439485 | 1.151261  |
| 6                | 3.374179                | -0.816844 | -1.328760 |
| 1                | 1.773065                | 0.361903  | -2.124554 |
| 6                | 3.338448                | -1.193285 | 1.052701  |
| 1                | 1.710769                | -0.308090 | 2.125954  |
| 6                | 3.943626                | -1.381989 | -0.188839 |

|    |           |           |           |
|----|-----------|-----------|-----------|
| 1  | 3.839142  | -0.963367 | -2.297657 |
| 1  | 3.775430  | -1.633406 | 1.942512  |
| 1  | 4.852280  | -1.968601 | -0.267898 |
| 14 | -0.014850 | 1.135939  | 0.153816  |

B3LYP/6-311++G(d,p) = -904.7536838 Hartrees

|                   |          |          |          |          |
|-------------------|----------|----------|----------|----------|
| Low frequencies = | 31.3673  | 36.4627  | 42.9800  | 113.2379 |
| 130.9576          | 141.0856 | 196.9595 | 214.7862 | 246.2041 |
| 251.3847          |          |          |          |          |

### Diphenyl ketone (Ge)

| Atomic<br>Number | Coordinates (Angstroms) |           |           |
|------------------|-------------------------|-----------|-----------|
|                  | X                       | Y         | Z         |
| 8                | -0.084802               | 1.953397  | 1.461863  |
| 1                | 0.755669                | 2.356987  | 1.699240  |
| 1                | 0.757014                | 2.395948  | -1.709942 |
| 8                | -0.051324               | 1.903263  | -1.537514 |
| 6                | -1.688678               | -0.048724 | -0.017021 |
| 6                | -2.375531               | -0.265644 | 1.183857  |
| 6                | -2.223409               | -0.547554 | -1.211505 |
| 6                | -3.574755               | -0.976886 | 1.189555  |
| 1                | -1.982757               | 0.136567  | 2.110892  |
| 6                | -3.422028               | -1.258805 | -1.203291 |
| 1                | -1.714534               | -0.367211 | -2.152022 |
| 6                | -4.096958               | -1.475915 | -0.002644 |
| 1                | -4.103195               | -1.136096 | 2.123110  |
| 1                | -3.831333               | -1.637895 | -2.133236 |
| 1                | -5.030201               | -2.028324 | 0.002870  |
| 6                | 1.683046                | -0.056142 | 0.013753  |
| 6                | 2.368246                | -0.343066 | -1.174537 |
| 6                | 2.228665                | -0.492462 | 1.229108  |
| 6                | 3.571389                | -1.047718 | -1.148697 |
| 1                | 1.961465                | -0.019002 | -2.126830 |
| 6                | 3.430681                | -1.198254 | 1.255628  |
| 1                | 1.714337                | -0.284748 | 2.161923  |
| 6                | 4.103818                | -1.475355 | 0.066467  |
| 1                | 4.091252                | -1.263354 | -2.075766 |
| 1                | 3.841016                | -1.531447 | 2.202610  |
| 1                | 5.038647                | -2.024447 | 0.086796  |
| 32               | -0.013603               | 0.927153  | -0.020890 |

B3LYP/6-311++G(d,p) = -2692.1906086 Hartrees

|                   |          |          |          |          |
|-------------------|----------|----------|----------|----------|
| Low frequencies = | 22.0995  | 29.6572  | 37.1017  | 84.6148  |
| 121.1503          | 123.6429 | 177.4247 | 198.3724 | 215.2235 |
| 222.5055          |          |          |          |          |

### Transition State: Addition of Carbon dioxide

#### Formaldehyde (C)

| Atomic<br>Number | Coordinates (Angstroms) |           |           |
|------------------|-------------------------|-----------|-----------|
|                  | X                       | Y         | Z         |
| 8                | 0.675944                | -1.026513 | -0.000001 |
| 8                | 0.032322                | 1.153766  | -0.000001 |
| 6                | -0.696064               | 0.145480  | -0.000001 |
| 8                | -1.753905               | -0.323121 | 0.000001  |
| 1                | 1.932668                | 0.331620  | 0.926451  |
| 1                | 1.932675                | 0.331622  | -0.926445 |
| 6                | 1.446026                | 0.005136  | 0.000001  |

B3LYP/6-311++G(d,p) = - 303.11476732 Hartrees

Low frequencies = -803.9041                      148.9052                      337.0545                      543.7176                      598.2908  
686.5198                      772.6265                      1132.0379                      1201.3423

### Formaldehyde (Si)

| Atomic<br>Number | Coordinates (Angstroms) |           |           |
|------------------|-------------------------|-----------|-----------|
|                  | X                       | Y         | Z         |
| 8                | -0.494532               | 1.236869  | -0.000016 |
| 8                | 0.356817                | -1.144693 | -0.000015 |
| 6                | 1.149945                | -0.226484 | -0.000002 |
| 8                | 2.140669                | 0.350089  | 0.000011  |
| 1                | -1.983342               | -0.617685 | 1.220540  |
| 1                | -1.983400               | -0.617708 | -1.220486 |
| 14               | -1.354040               | -0.067416 | 0.000009  |

B3LYP/6-311++G(d,p) = -554.5948083 Hartrees

Low frequencies = -334.9700                      122.4124                      259.2291                      334.2598                      508.2733  
616.9622                      641.2189                      689.4470                      828.6796                      1011.4029

### Formaldehyde (Ge)

| Atomic<br>Number | Coordinates (Angstroms) |           |           |
|------------------|-------------------------|-----------|-----------|
|                  | X                       | Y         | Z         |
| 8                | 0.063680                | 1.252997  | -0.000007 |
| 8                | 0.802884                | -1.178617 | 0.000000  |
| 6                | 1.564005                | -0.231126 | -0.000012 |
| 8                | 2.577419                | 0.317603  | -0.000024 |
| 1                | -1.702083               | -0.549741 | 1.286440  |
| 1                | -1.702105               | -0.549756 | -1.286405 |
| 32               | -1.047866               | -0.020300 | 0.000009  |

B3LYP/6-311++G(d,p) = -2342.0519364 Hartrees

Low frequencies = -366.2952                      110.0662                      236.6786                      292.6874                      379.1176  
569.2435                      613.7642                      659.3954                      706.2694                      869.9224

### Acetone (C)

| Atomic | Coordinates (Angstroms) |  |  |
|--------|-------------------------|--|--|
|--------|-------------------------|--|--|

| Number | X         | Y         | Z         |
|--------|-----------|-----------|-----------|
| 8      | 1.052023  | -0.240056 | 0.000000  |
| 6      | 0.042544  | 1.532328  | 1.286237  |
| 1      | 0.892769  | 2.216140  | 1.408784  |
| 1      | -0.872914 | 2.123603  | 1.271792  |
| 1      | 0.041985  | 0.840167  | 2.126558  |
| 6      | 0.042544  | 1.532328  | -1.286237 |
| 1      | 0.041985  | 0.840167  | -2.126558 |
| 1      | -0.872914 | 2.123603  | -1.271792 |
| 1      | 0.892769  | 2.216140  | -1.408784 |
| 8      | -1.188174 | -0.508336 | 0.000000  |
| 6      | -0.242988 | -1.320827 | 0.000000  |
| 8      | 0.042544  | -2.455746 | 0.000000  |
| 6      | 0.262095  | 0.801718  | 0.000000  |

B3LYP/6-311++G(d,p) = -381.7931236 Hartrees

Low frequencies = -729.5633                      86.6659                      153.1034                      198.1897                      215.7295  
268.1555                      336.6497                      461.6793                      498.9580                      542.3616

#### Acetone (Si)

| Atomic<br>Number | Coordinates (Angstroms) |           |           |
|------------------|-------------------------|-----------|-----------|
|                  | X                       | Y         | Z         |
| 14               | -0.006223               | 0.815241  | 0.000000  |
| 8                | 1.404603                | 0.135925  | 0.000000  |
| 6                | -0.781239               | 1.491050  | 1.553586  |
| 1                | -0.478070               | 2.535691  | 1.683770  |
| 1                | -1.873411               | 1.466483  | 1.511186  |
| 1                | -0.442960               | 0.935352  | 2.430135  |
| 6                | -0.781239               | 1.491050  | -1.553586 |
| 1                | -0.442960               | 0.935352  | -2.430135 |
| 1                | -1.873411               | 1.466483  | -1.511186 |
| 1                | -0.478070               | 2.535691  | -1.683770 |
| 8                | -0.781239               | -1.151291 | 0.000000  |
| 6                | 0.280512                | -1.728702 | 0.000000  |
| 8                | 1.047610                | -2.585737 | 0.000000  |

B3LYP/6-311++G(d,p) = - 633.2865802Hartrees

Low frequencies = -324.5875                      72.5335                      91.7366                      113.6591                      147.9996  
168.2845                      212.3006                      275.8995                      302.1543                      327.4553

#### Acetone (Ge)

| Atomic<br>Number | Coordinates (Angstroms) |           |          |
|------------------|-------------------------|-----------|----------|
|                  | X                       | Y         | Z        |
| 8                | 1.225475                | -0.764263 | 0.000000 |
| 6                | -0.169484               | 1.582653  | 1.651119 |
| 1                | 0.512230                | 2.429426  | 1.767471 |
| 1                | -1.192035               | 1.962240  | 1.610456 |



|    |           |           |           |
|----|-----------|-----------|-----------|
| 1  | -0.051801 | 0.910961  | 2.500708  |
| 6  | -0.169484 | 1.582653  | -1.651119 |
| 1  | -0.051801 | 0.910961  | -2.500708 |
| 1  | -1.192035 | 1.962240  | -1.610456 |
| 1  | 0.512230  | 2.429426  | -1.767471 |
| 8  | -1.310539 | -1.007621 | 0.000000  |
| 6  | -0.518292 | -1.922794 | 0.000000  |
| 8  | -0.169484 | -3.025455 | 0.000000  |
| 32 | 0.270099  | 0.634950  | 0.000000  |

B3LYP/6-311++G(d,p) = -2420.7366789 Hartrees

Low frequencies = -336.2891                      64.6295                      69.2402                      86.9719                      108.8574  
142.0713                      172.6036                      230.4277                      230.8974                      292.7010

#### 4-Dimethyl-3-pentanone (C)

| Atomic<br>Number | Coordinates (Angstroms) |           |           |
|------------------|-------------------------|-----------|-----------|
|                  | X                       | Y         | Z         |
| 8                | 0.792746                | -0.212790 | -1.035935 |
| 6                | -1.092672               | -1.162059 | 0.117951  |
| 1                | -0.459091               | -2.049866 | 0.193030  |
| 1                | -0.827341               | 1.342559  | 1.346886  |
| 6                | -1.958874               | -1.365164 | -1.150127 |
| 1                | -1.337489               | -1.410530 | -2.045513 |
| 1                | -2.494249               | -2.312970 | -1.056805 |
| 1                | -2.701265               | -0.575424 | -1.276958 |
| 6                | -1.933378               | -1.054552 | 1.392646  |
| 1                | -2.517856               | -1.968683 | 1.523115  |
| 1                | -1.299577               | -0.935019 | 2.274027  |
| 1                | -2.638974               | -0.219981 | 1.354175  |
| 6                | -1.492156               | 1.974212  | -0.604268 |
| 1                | -2.442513               | 1.445412  | -0.530681 |
| 1                | -1.667236               | 3.015776  | -0.326253 |
| 1                | -1.158832               | 1.952616  | -1.644489 |
| 6                | 0.828017                | 2.299747  | 0.347862  |
| 1                | 0.531101                | 3.309541  | 0.641250  |
| 1                | 1.576087                | 1.946944  | 1.057886  |
| 1                | 1.284873                | 2.353096  | -0.642252 |
| 6                | 1.972719                | -0.683253 | 0.023001  |
| 8                | 1.364306                | -0.589247 | 1.109083  |
| 8                | 3.007368                | -0.965401 | -0.455442 |
| 6                | -0.111148               | -0.025398 | -0.101559 |
| 6                | -0.406342               | 1.390805  | 0.339649  |

B3LYP/6-311++G(d,p) = -539.0858091 Hartrees

Low frequencies = -689.8250                      55.4721                      72.4675                      78.5044                      167.8710  
181.7904                      201.0913                      203.8627                      223.3269                      241.7629

#### 4-Dimethyl-3-pentanone (Si)

Atomic                      Coordinates (Angstroms)

| Number | X         | Y         | Z         |
|--------|-----------|-----------|-----------|
| 14     | -0.053638 | -0.053121 | -0.265385 |
| 8      | 1.013660  | -0.285664 | -1.392883 |
| 6      | -1.309602 | -1.402318 | 0.144431  |
| 1      | -0.696250 | -2.308216 | 0.233491  |
| 6      | -0.471740 | 1.678945  | 0.355515  |
| 1      | -0.824894 | 1.571567  | 1.389040  |
| 6      | -2.277862 | -1.623913 | -1.039859 |
| 1      | -1.741001 | -1.804927 | -1.974136 |
| 1      | -2.916102 | -2.492287 | -0.846092 |
| 1      | -2.939026 | -0.764779 | -1.191485 |
| 6      | -2.064017 | -1.193849 | 1.469171  |
| 1      | -2.719321 | -2.047304 | 1.672886  |
| 1      | -1.385128 | -1.092206 | 2.320642  |
| 1      | -2.696541 | -0.301319 | 1.437639  |
| 6      | -1.633077 | 2.263419  | -0.483828 |
| 1      | -2.535191 | 1.646041  | -0.443862 |
| 1      | -1.902372 | 3.257034  | -0.111204 |
| 1      | -1.348645 | 2.375227  | -1.534464 |
| 6      | 0.745526  | 2.620325  | 0.343223  |
| 1      | 0.453932  | 3.622027  | 0.676715  |
| 1      | 1.539468  | 2.271168  | 1.008173  |
| 1      | 1.166195  | 2.709250  | -0.661584 |
| 6      | 2.358133  | -0.776416 | 0.236162  |
| 8      | 1.513078  | -0.590036 | 1.079298  |
| 8      | 3.374717  | -1.036143 | -0.237572 |

B3LYP/6-311++G(d,p) = -790.5694428 Hartrees

|                   |           |          |          |          |          |
|-------------------|-----------|----------|----------|----------|----------|
| Low frequencies = | -323.1234 | 29.4404  | 38.1523  | 56.3106  | 96.6919  |
|                   | 110.1782  | 124.2570 | 191.4898 | 194.5529 | 209.5853 |

#### 4-Dimethyl-3-pentanone (Ge)

| Atomic<br>Number | Coordinates (Angstroms) |           |           |
|------------------|-------------------------|-----------|-----------|
|                  | X                       | Y         | Z         |
| 8                | 1.172539                | -0.322518 | -1.319337 |
| 6                | -1.385177               | -1.478633 | 0.199804  |
| 1                | -0.740546               | -2.353863 | 0.330307  |
| 6                | -0.495972               | 1.815825  | 0.395366  |
| 1                | -0.861882               | 1.710669  | 1.422412  |
| 6                | -2.303411               | -1.729795 | -1.009753 |
| 1                | -1.733737               | -1.930093 | -1.920415 |
| 1                | -2.942127               | -2.599049 | -0.818585 |
| 1                | -2.965759               | -0.879948 | -1.203553 |
| 6                | -2.169541               | -1.227195 | 1.493349  |
| 1                | -2.826686               | -2.077487 | 1.707016  |
| 1                | -1.512074               | -1.097269 | 2.357212  |
| 1                | -2.805878               | -0.339856 | 1.417441  |
| 6                | -1.625947               | 2.402076  | -0.473306 |
| 1                | -2.539243               | 1.800715  | -0.440504 |



### Diphenyl ketone (Si)

| Atomic<br>Number | Coordinates (Angstroms) |           |           |
|------------------|-------------------------|-----------|-----------|
|                  | X                       | Y         | Z         |
| 14               | -0.021521               | 0.583800  | -0.407538 |
| 8                | -0.036512               | 1.941873  | -1.194367 |
| 6                | -0.002605               | 2.879300  | 0.718870  |
| 8                | -0.036806               | 1.828327  | 1.316338  |
| 8                | 0.030202                | 4.018825  | 0.547359  |
| 6                | -1.583133               | -0.398697 | -0.193976 |
| 6                | -1.600312               | -1.784663 | 0.036109  |
| 6                | -2.811917               | 0.272233  | -0.333083 |
| 6                | -2.806171               | -2.474812 | 0.141928  |
| 1                | -0.670208               | -2.335049 | 0.119403  |
| 6                | -4.016029               | -0.416054 | -0.222780 |
| 1                | -2.819501               | 1.335945  | -0.545133 |
| 6                | -4.013742               | -1.790227 | 0.018180  |
| 1                | -2.803306               | -3.544946 | 0.316276  |
| 1                | -4.954909               | 0.115176  | -0.331514 |
| 1                | -4.952141               | -2.327433 | 0.100806  |
| 6                | 1.573841                | -0.335809 | -0.153848 |
| 6                | 2.626168                | -0.069615 | -1.046902 |
| 6                | 1.793329                | -1.254834 | 0.886653  |
| 6                | 3.852273                | -0.718414 | -0.915785 |
| 1                | 2.480905                | 0.654302  | -1.841707 |
| 6                | 3.023081                | -1.893101 | 1.024948  |
| 1                | 1.010009                | -1.462161 | 1.608061  |
| 6                | 4.050933                | -1.630434 | 0.119143  |
| 1                | 4.652727                | -0.507300 | -1.615969 |
| 1                | 3.181421                | -2.591985 | 1.838731  |
| 1                | 5.006947                | -2.131189 | 0.225208  |

B3LYP/6-311++G(d,p) = -1016.8424596 Hartrees

|                             |          |          |          |          |
|-----------------------------|----------|----------|----------|----------|
| Low frequencies = -335.7177 | 23.2993  | 37.8307  | 45.4778  | 62.0294  |
| 75.3124                     | 106.5420 | 152.9451 | 176.8253 | 186.5619 |

### Diphenyl ketone (Ge)

| Atomic<br>Number | Coordinates (Angstroms) |           |           |
|------------------|-------------------------|-----------|-----------|
|                  | X                       | Y         | Z         |
| 8                | -0.000909               | 1.984798  | -1.077031 |
| 6                | 0.048800                | 2.889821  | 0.761378  |
| 8                | -0.001838               | 1.892800  | 1.444832  |
| 8                | 0.103227                | 4.031675  | 0.563612  |
| 6                | -1.687596               | -0.504370 | -0.146563 |
| 6                | -1.756844               | -1.893246 | 0.032224  |
| 6                | -2.874703               | 0.237635  | -0.238327 |
| 6                | -2.993788               | -2.526718 | 0.135103  |
| 1                | -0.852385               | -2.488728 | 0.077328  |
| 6                | -4.108355               | -0.397992 | -0.130555 |

|    |           |           |           |
|----|-----------|-----------|-----------|
| 1  | -2.829380 | 1.308127  | -0.405400 |
| 6  | -4.167793 | -1.778830 | 0.059351  |
| 1  | -3.040984 | -3.601326 | 0.270688  |
| 1  | -5.022199 | 0.181091  | -0.199695 |
| 1  | -5.129527 | -2.272959 | 0.140835  |
| 6  | 1.664392  | -0.495653 | -0.110200 |
| 6  | 2.764176  | -0.042764 | -0.853679 |
| 6  | 1.827450  | -1.569690 | 0.776401  |
| 6  | 4.002816  | -0.667085 | -0.723366 |
| 1  | 2.647437  | 0.800921  | -1.525500 |
| 6  | 3.070209  | -2.184280 | 0.911159  |
| 1  | 0.997310  | -1.918143 | 1.380645  |
| 6  | 4.155309  | -1.736936 | 0.157469  |
| 1  | 4.848406  | -0.314920 | -1.303258 |
| 1  | 3.193155  | -3.008238 | 1.605022  |
| 1  | 5.121059  | -2.218671 | 0.262282  |
| 32 | -0.012537 | 0.446229  | -0.360520 |

B3LYP/6-311++G(d,p) = -2804.2929635 Hartrees

|                   |           |          |          |          |         |
|-------------------|-----------|----------|----------|----------|---------|
| Low frequencies = | -337.7021 | 20.6750  | 30.5972  | 39.9033  | 53.5967 |
| 68.6168           | 88.2162   | 141.3601 | 159.0976 | 168.2284 |         |

### Products: Addition of Carbon dioxide

#### Formaldehyde (C)

| Atomic<br>Number | Coordinates (Angstroms) |           |           |
|------------------|-------------------------|-----------|-----------|
|                  | X                       | Y         | Z         |
| 6                | -0.581260               | 0.000001  | -0.000049 |
| 8                | -1.757631               | -0.000001 | -0.000083 |
| 8                | 0.343488                | 1.018488  | 0.000023  |
| 6                | 1.358317                | 0.000000  | 0.000067  |
| 8                | 0.343491                | -1.018488 | 0.000023  |
| 1                | 1.951395                | 0.000002  | 0.913653  |
| 1                | 1.951479                | 0.000002  | -0.913464 |

B3LYP/6-311++G(d,p) = -303.159721 Hartrees

|                   |           |           |           |           |          |
|-------------------|-----------|-----------|-----------|-----------|----------|
| Low frequencies = | 267.5988  | 532.8376  | 761.2266  | 825.0727  | 871.8506 |
| 1033.4596         | 1080.4359 | 1091.6029 | 1105.9169 | 1147.4873 |          |

#### Formaldehyde (Si)

| Atomic<br>Number | Coordinates (Angstroms) |           |           |
|------------------|-------------------------|-----------|-----------|
|                  | X                       | Y         | Z         |
| 6                | -0.887709               | 0.000001  | -0.000018 |
| 8                | -2.067043               | 0.000001  | -0.000050 |
| 8                | -0.026142               | 1.085633  | 0.000206  |
| 8                | -0.026150               | -1.085630 | -0.000189 |
| 14               | 1.292859                | -0.000001 | 0.000022  |
| 1                | 2.090435                | -0.000229 | 1.235488  |

1 2.090469 0.000212 -1.235421

B3LYP/6-311++G(d,p) = -554.636638 Hartrees

Low frequencies = 185.5915 511.4502 553.4071 618.0281 657.1564  
689.1205 790.2277 800.2684 892.8391 949.1278

### Formaldehyde (Ge)

| Atomic<br>Number | Coordinates (Angstroms) |           |           |
|------------------|-------------------------|-----------|-----------|
|                  | X                       | Y         | Z         |
| 6                | 1.310433                | 0.000000  | 0.000015  |
| 8                | 2.495287                | 0.000000  | 0.000656  |
| 8                | 0.479987                | -1.100077 | -0.000805 |
| 8                | 0.479987                | 1.100077  | -0.000806 |
| 1                | -1.774389               | 0.000002  | 1.311503  |
| 1                | -1.775373               | -0.000002 | -1.310511 |
| 32               | -0.998591               | 0.000000  | 0.000205  |

B3LYP/6-311++G(d,p) = -2342.0939783 Hartrees

Low frequencies = 170.6399 443.6763 469.6260 488.0771 579.6388  
609.4445 706.9200 790.5192 825.2931 863.9287

### Acetone (C)

| Atomic<br>Number | Coordinates (Angstroms) |           |           |
|------------------|-------------------------|-----------|-----------|
|                  | X                       | Y         | Z         |
| 6                | -1.502125               | -1.280389 | 0.000254  |
| 1                | -0.834680               | -2.142752 | -0.000226 |
| 6                | -1.501472               | 1.281037  | 0.000256  |
| 1                | -0.833539               | 2.143015  | -0.000199 |
| 1                | -2.138059               | -1.321823 | -0.886672 |
| 1                | -2.136460               | 1.323088  | 0.887839  |
| 1                | -2.137105               | -1.322080 | 0.887856  |
| 1                | -2.137374               | 1.322854  | -0.886682 |
| 6                | 1.254220                | -0.000074 | -0.000188 |
| 8                | 2.435053                | 0.000263  | -0.000383 |
| 8                | 0.342142                | -0.000533 | 1.019252  |
| 6                | -0.706445               | 0.000108  | 0.000059  |
| 8                | 0.341824                | -0.000529 | -1.019394 |

B3LYP/6-311++G(d,p) = -381.8317874 Hartrees

Low frequencies = 140.1324 185.8499 227.3237 335.6322  
340.2355 360.1015 504.7515 576.7587 664.4039 774.0347

### Acetone (Si)

| Atomic<br>Number | Coordinates (Angstroms) |           |           |
|------------------|-------------------------|-----------|-----------|
|                  | X                       | Y         | Z         |
| 14               | 0.688185                | -0.000001 | -0.000078 |

|   |           |           |           |
|---|-----------|-----------|-----------|
| 8 | -0.650390 | 0.000018  | 1.083419  |
| 6 | 1.669632  | 1.570485  | 0.000175  |
| 1 | 2.312149  | 1.625855  | 0.883926  |
| 1 | 2.313531  | 1.625524  | -0.882578 |
| 1 | 1.008445  | 2.439429  | -0.000472 |
| 6 | 1.669670  | -1.570463 | 0.000185  |
| 1 | 1.008501  | -2.439420 | -0.000333 |
| 1 | 2.313473  | -1.625548 | -0.882636 |
| 1 | 2.312287  | -1.625760 | 0.883868  |
| 8 | -0.650293 | 0.000002  | -1.083562 |
| 6 | -1.504734 | -0.000091 | -0.000058 |
| 8 | -2.688116 | 0.000022  | -0.000169 |

B3LYP/6-311++G(d,p) = -633.3321868 Hartrees

Low frequencies = 108.4340                      109.2376                      131.2816                      188.5156                      200.6683  
217.2258                      316.6948                      504.5779                      517.5972                      680.6151

#### Acetone (Ge)

| Atomic<br>Number | Coordinates (Angstroms) |           |           |
|------------------|-------------------------|-----------|-----------|
|                  | X                       | Y         | Z         |
| 6                | 1.727480                | -0.000138 | -0.000100 |
| 8                | 2.916493                | 0.000026  | -0.000114 |
| 8                | 0.903083                | -0.000141 | -1.098905 |
| 1                | -0.841776               | 2.506897  | -0.003662 |
| 6                | -1.557412               | 1.685149  | 0.000289  |
| 32               | -0.594150               | 0.000010  | -0.000099 |
| 1                | -2.185836               | 1.752659  | 0.890510  |
| 1                | -2.192501               | 1.749722  | -0.885389 |
| 8                | 0.903088                | -0.000150 | 1.098699  |
| 6                | -1.557853               | -1.684874 | 0.000283  |
| 1                | -2.186194               | -1.752254 | 0.890572  |
| 1                | -2.193054               | -1.749207 | -0.885330 |
| 1                | -0.842455               | -2.506829 | -0.003794 |

B3LYP/6-311++G(d,p) = -2420.7811314 Hartrees

Low frequencies = 77.4955                      91.0959                      98.3069                      157.8960                      162.0131  
164.9902                      252.7697                      430.7962                      441.8438                      586.1838

#### 4-Dimethyl-3-pentanone (C)

| Atomic<br>Number | Coordinates (Angstroms) |           |           |
|------------------|-------------------------|-----------|-----------|
|                  | X                       | Y         | Z         |
| 6                | -0.000053               | -0.137898 | 0.000023  |
| 8                | -0.197612               | 0.914883  | -1.000078 |
| 6                | 1.285736                | -0.934094 | -0.249267 |
| 6                | -1.286339               | -0.933275 | 0.249281  |
| 6                | 1.590545                | -1.879604 | 0.925364  |
| 1                | 0.819622                | -2.639596 | 1.067222  |

|   |           |           |           |
|---|-----------|-----------|-----------|
| 1 | 2.533608  | -2.399671 | 0.742282  |
| 6 | 2.493537  | -0.032116 | -0.545907 |
| 1 | 3.357291  | -0.654407 | -0.791445 |
| 6 | -1.591714 | -1.878595 | -0.925350 |
| 1 | -0.821313 | -2.639131 | -1.067120 |
| 1 | -2.535157 | -2.397992 | -0.742330 |
| 6 | -2.493552 | -0.030487 | 0.545837  |
| 1 | -3.357753 | -0.652201 | 0.791268  |
| 1 | 2.308979  | 0.630222  | -1.392720 |
| 1 | -2.308628 | 0.631702  | 1.392688  |
| 1 | -1.695939 | -1.317684 | -1.858370 |
| 1 | 1.695244  | -1.318741 | 1.858360  |
| 1 | 2.758174  | 0.576758  | 0.321795  |
| 1 | -2.757686 | 0.578598  | -0.321872 |
| 1 | -1.093574 | -1.535815 | 1.143169  |
| 1 | 1.092548  | -1.536526 | -1.143135 |
| 8 | 0.198032  | 0.914762  | 1.000135  |
| 6 | 0.000622  | 1.824075  | -0.000003 |
| 8 | 0.001066  | 3.006160  | -0.000013 |

B3LYP/6-311++G(d,p) = -539.1243472 Hartrees

|                           |          |          |          |          |
|---------------------------|----------|----------|----------|----------|
| Low frequencies = 60.5088 | 63.0274  | 112.0071 | 185.2485 | 188.4650 |
| 214.1943                  | 223.8973 | 238.4665 | 259.6355 | 282.0943 |

#### 4-Dimethyl-3-pentanone (Si)

| Atomic<br>Number | Coordinates (Angstroms) |           |           |
|------------------|-------------------------|-----------|-----------|
|                  | X                       | Y         | Z         |
| 14               | -0.009425               | -0.091587 | 0.116191  |
| 8                | 1.142925                | -0.522545 | -1.097151 |
| 6                | -1.498653               | -1.234277 | 0.142435  |
| 1                | -1.051207               | -2.223550 | 0.305309  |
| 6                | -0.260323               | 1.757565  | 0.317580  |
| 1                | -0.790524               | 1.874557  | 1.273666  |
| 6                | -2.251873               | -1.278513 | -1.203969 |
| 1                | -1.585441               | -1.513056 | -2.037721 |
| 1                | -3.027301               | -2.050342 | -1.172106 |
| 1                | -2.748639               | -0.329617 | -1.425003 |
| 6                | -2.446650               | -0.939552 | 1.322337  |
| 1                | -3.245233               | -1.687024 | 1.361183  |
| 1                | -1.929883               | -0.964952 | 2.286187  |
| 1                | -2.924391               | 0.039942  | 1.222138  |
| 6                | -1.151624               | 2.354735  | -0.793411 |
| 1                | -2.145238               | 1.900507  | -0.824324 |
| 1                | -1.288614               | 3.427585  | -0.626549 |
| 1                | -0.694982               | 2.234469  | -1.780332 |
| 6                | 1.084765                | 2.504249  | 0.422614  |
| 1                | 0.908543                | 3.569955  | 0.599166  |
| 1                | 1.700683                | 2.125650  | 1.240945  |
| 1                | 1.661558                | 2.413501  | -0.501861 |



|   |          |           |           |
|---|----------|-----------|-----------|
| 6 | 2.008150 | -0.937125 | -0.106226 |
| 8 | 1.310993 | -0.696299 | 1.056435  |
| 8 | 3.094814 | -1.393393 | -0.228725 |

B3LYP/6-311++G(d,p) = -790.6151688 Hartrees

|                           |          |          |          |          |
|---------------------------|----------|----------|----------|----------|
| Low frequencies = 31.6773 | 38.7259  | 81.9360  | 99.8143  | 113.9718 |
| 142.9947                  | 203.3878 | 217.0237 | 230.0683 | 236.5551 |

#### 4-Dimethyl-3-pentanone (Ge)

| Atomic<br>Number | Coordinates (Angstroms) |           |           |
|------------------|-------------------------|-----------|-----------|
|                  | X                       | Y         | Z         |
| 32               | 0.000048                | -0.159672 | 0.000021  |
| 8                | 0.186504                | 1.349922  | -1.082584 |
| 6                | -1.706077               | -1.108638 | -0.291524 |
| 1                | -1.547817               | -1.682333 | -1.212734 |
| 6                | 1.706430                | -1.108177 | 0.291612  |
| 1                | 1.548820                | -1.680528 | 1.213769  |
| 6                | 2.854557                | -0.113087 | 0.509430  |
| 1                | 2.656415                | 0.562954  | 1.343563  |
| 1                | 3.779671                | -0.656491 | 0.728312  |
| 1                | 3.027759                | 0.495097  | -0.381964 |
| 6                | 1.986562                | -2.091665 | -0.858162 |
| 1                | 2.908402                | -2.646712 | -0.656697 |
| 1                | 1.186094                | -2.825842 | -0.987769 |
| 1                | 2.123689                | -1.568235 | -1.808942 |
| 6                | -1.986953               | -2.090497 | 0.859481  |
| 1                | -2.908707               | -2.645763 | 0.658229  |
| 1                | -1.186626               | -2.824562 | 0.990613  |
| 1                | -2.124614               | -1.565713 | 1.809434  |
| 6                | -2.854114               | -0.113924 | -0.511503 |
| 1                | -2.655442               | 0.561008  | -1.346403 |
| 1                | -3.779043               | -0.657692 | -0.730264 |
| 1                | -3.027979               | 0.495452  | 0.378951  |
| 8                | -0.000183               | 3.360954  | 0.000276  |
| 6                | -0.000438               | 2.169973  | 0.000137  |
| 8                | -0.186566               | 1.349743  | 1.082857  |

B3LYP/6-311++G(d,p) = -2578.0699199 Hartrees

|                           |          |          |          |          |
|---------------------------|----------|----------|----------|----------|
| Low frequencies = 31.2681 | 35.8488  | 72.7625  | 77.1881  | 84.9983  |
| 146.0287                  | 202.5655 | 222.8005 | 227.5078 | 228.1675 |

#### Diphenyl ketone (C)

| Atomic<br>Number | Coordinates (Angstroms) |          |           |
|------------------|-------------------------|----------|-----------|
|                  | X                       | Y        | Z         |
| 6                | -0.000059               | 0.622377 | 0.000020  |
| 8                | 0.020535                | 1.680082 | -1.019505 |
| 8                | -0.021620               | 1.680173 | 1.019367  |

|   |           |           |           |
|---|-----------|-----------|-----------|
| 6 | -0.000048 | 2.589884  | -0.000115 |
| 8 | -0.001645 | 3.770560  | -0.000189 |
| 6 | -1.279699 | -0.172985 | -0.037601 |
| 6 | -2.333913 | 0.107982  | 0.833893  |
| 6 | -1.420519 | -1.187244 | -0.991339 |
| 6 | -3.519828 | -0.621080 | 0.750473  |
| 1 | -2.224059 | 0.887699  | 1.576423  |
| 6 | -2.610398 | -1.902269 | -1.079972 |
| 1 | -0.601939 | -1.414463 | -1.664680 |
| 6 | -3.662061 | -1.622265 | -0.206783 |
| 1 | -4.331656 | -0.402529 | 1.434741  |
| 1 | -2.715635 | -2.680665 | -1.826994 |
| 1 | -4.586478 | -2.184894 | -0.272263 |
| 6 | 1.279948  | -0.172409 | 0.037706  |
| 6 | 1.421736  | -1.185601 | 0.992435  |
| 6 | 2.333477  | 0.107975  | -0.834792 |
| 6 | 2.611900  | -1.900152 | 1.081021  |
| 1 | 0.603694  | -1.412343 | 1.666595  |
| 6 | 3.519686  | -0.620625 | -0.751398 |
| 1 | 2.222880  | 0.886900  | -1.578042 |
| 6 | 3.662882  | -1.620751 | 0.206815  |
| 1 | 2.717898  | -2.677704 | 1.828816  |
| 1 | 4.330989  | -0.402525 | -1.436432 |
| 1 | 4.587524  | -2.183014 | 0.272271  |

B3LYP/6-311++G(d,p) = -765.3839939 Hartrees

|                   |          |          |          |          |          |
|-------------------|----------|----------|----------|----------|----------|
| Low frequencies = | 3.0187   | 30.5963  | 66.1957  | 80.6716  | 117.0464 |
| 199.7682          | 222.0921 | 285.5814 | 307.5207 | 337.9281 |          |

### Diphenyl ketone (Si)

| Atomic<br>Number | Coordinates (Angstroms) |           |           |
|------------------|-------------------------|-----------|-----------|
|                  | X                       | Y         | Z         |
| 14               | -0.000027               | 0.628591  | 0.000026  |
| 8                | -0.125655               | 1.974414  | 1.074565  |
| 6                | -0.000029               | 2.827371  | 0.000068  |
| 8                | 0.125593                | 1.974450  | -1.074465 |
| 8                | 0.000000                | 4.012034  | 0.000090  |
| 6                | 1.570628                | -0.347191 | 0.043354  |
| 6                | 2.727193                | 0.154706  | -0.579495 |
| 6                | 1.650659                | -1.574465 | 0.724195  |
| 6                | 3.925879                | -0.551187 | -0.522108 |
| 1                | 2.685428                | 1.096498  | -1.115271 |
| 6                | 2.852272                | -2.275505 | 0.786450  |
| 1                | 0.773525                | -1.985905 | 1.212758  |
| 6                | 3.989324                | -1.764491 | 0.161965  |
| 1                | 4.809092                | -0.155156 | -1.010248 |
| 1                | 2.901687                | -3.218145 | 1.319616  |
| 1                | 4.924174                | -2.311995 | 0.207856  |
| 6                | -1.570639               | -0.347249 | -0.043345 |
| 6                | -1.650445               | -1.574794 | -0.723724 |
